# Supplementary material for: Evaluation of a Complex Intervention to Strengthen Participation-Centred Care for Children with Special Healthcare Needs: Protocol of the Stepped Wedge Cluster Randomised PART-CHILD Trial
Source: MDPI journal article supplement (doi:10.3390/ijerph192416865), 2022-12-15
Supplement: s1 [file s1]

## Online Supplementary Files

**Online Supplementary File S1: SAS Code for fitting the model for the primary endpoint**

```
proc glimmix empirical=firores; class SPC PERIOD /ref=first; model  
TOPSCORERS/PARENTS = PERIOD INTERVENTION/ oddsratio dist=binomial  
ddfm=none covb s; random period / subject=SPC type=cs residual.
```

**Online Supplementary File S2: Surveys among SPC directors and their staff**

[illegible]

## 2. Bitte geben Sie an, **wie gut Sie in der Regel folgende Aspekte** bei Ihrer Arbeit mit Patienten bzw. Eltern **umsetzen können**.

 Bitte machen Sie in jeder Zeile ein Kreuz. Wenn Sie als Fachkraft nur mit Kleinkindern bzw. mit schwerbehinderten Patienten arbeiten, kreuzen Sie bitte „nicht zutreffend“ an.

| Patienten                                                                                   | Überhaupt nicht gut      |                          |                          |                          |                          |                          |                          |                          |                          |                          | Sehr gut | Nicht zutreffend         |
|---------------------------------------------------------------------------------------------|--------------------------|--------------------------|--------------------------|--------------------------|--------------------------|--------------------------|--------------------------|--------------------------|--------------------------|--------------------------|----------|--------------------------|
|                                                                                             | 0                        | 1                        | 2                        | 3                        | 4                        | 5                        | 6                        | 7                        | 8                        | 9                        |          |                          |
| ... bekommen stets klare Informationen.                                                     | <input type="checkbox"/> |          | <input type="checkbox"/> |
| ... bekommen immer Gelegenheit Fragen zu stellen.                                           | <input type="checkbox"/> |          | <input type="checkbox"/> |
| ... äußern ihre Meinungen.                                                                  | <input type="checkbox"/> |          | <input type="checkbox"/> |
| ... werden stets in die Besprechung von Versorgungs- bzw. Therapieoptionen einbezogen.      | <input type="checkbox"/> |          | <input type="checkbox"/> |
| ... werden gleichberechtigt an Entscheidungen über ihre Versorgung bzw. Therapie beteiligt. | <input type="checkbox"/> |          | <input type="checkbox"/> |
| ... übernehmen die Verantwortung für ihre Gesundheit.                                       | <input type="checkbox"/> |          | <input type="checkbox"/> |

| Eltern                                                                                                   | Überhaupt nicht gut      |                          |                          |                          |                          |                          |                          |                          |                          |                          | Sehr gut |
|----------------------------------------------------------------------------------------------------------|--------------------------|--------------------------|--------------------------|--------------------------|--------------------------|--------------------------|--------------------------|--------------------------|--------------------------|--------------------------|----------|
|                                                                                                          | 0                        | 1                        | 2                        | 3                        | 4                        | 5                        | 6                        | 7                        | 8                        | 9                        |          |
| ... bekommen stets klare Informationen.                                                                  | <input type="checkbox"/> |          |
| ... bekommen immer Gelegenheit Fragen zu stellen.                                                        | <input type="checkbox"/> |          |
| ... äußern ihre Meinungen.                                                                               | <input type="checkbox"/> |          |
| ... werden stets in die Besprechung von Versorgungs- bzw. Therapieoptionen einbezogen.                   | <input type="checkbox"/> |          |
| ... werden gleichberechtigt an Entscheidungen über ihre Versorgung bzw. Therapie ihrer Kinder beteiligt. | <input type="checkbox"/> |          |
| ... übernehmen die Verantwortung für die Gesundheit ihrer Kinder.                                        | <input type="checkbox"/> |          |

## 3. Welche Barrieren **erschweren** Ihrer Meinung nach die **Patienten- und Elternzentrierung** in Ihrem beruflichen Alltag?

 Bitte nennen Sie drei aus Ihrer Sicht gravierende Barrieren. Stichpunkte reichen aus.

1.

2.

3.

## II. Merkmale des Arbeitsumfelds SPZ

1. Eines der Ziele des Projekts PART-CHILD ist die Umsetzung **einer teilhabeorientierten Patientenversorgung durch die Implementierung der ICF-CY in Ihrem SPZ**. Die teilhabeorientierte Patientenversorgung wird in den folgenden Aussagen kurz als „**Veränderung**“ bezeichnet.

Bitte schätzen Sie, inwiefern diese Aussagen für Ihr SPZ zutreffen werden.

 Bitte machen Sie in jeder Zeile ein Kreuz.

|                                                                                                                                                                                                                                                      | Trifft überhaupt nicht zu | Trifft eher nicht zu     | Trifft teilweise zu      | Trifft eher zu           | Trifft voll und ganz zu  |
|------------------------------------------------------------------------------------------------------------------------------------------------------------------------------------------------------------------------------------------------------|---------------------------|--------------------------|--------------------------|--------------------------|--------------------------|
| Die Leitung des SPZ kann die Mitarbeiter zur Umsetzung der Veränderung überdurchschnittlich gut motivieren.                                                                                                                                          | <input type="checkbox"/>  | <input type="checkbox"/> | <input type="checkbox"/> | <input type="checkbox"/> | <input type="checkbox"/> |
| Der Leitung des SPZ ist es ein Anliegen, dass die Veränderung umgesetzt wird.                                                                                                                                                                        | <input type="checkbox"/>  | <input type="checkbox"/> | <input type="checkbox"/> | <input type="checkbox"/> | <input type="checkbox"/> |
| Die Leitung des SPZ wird die Umsetzung der Veränderung systematisch unterstützen.                                                                                                                                                                    | <input type="checkbox"/>  | <input type="checkbox"/> | <input type="checkbox"/> | <input type="checkbox"/> | <input type="checkbox"/> |
| Alle Mitarbeiter werden sich bei der Umsetzung der Veränderung engagieren.                                                                                                                                                                           | <input type="checkbox"/>  | <input type="checkbox"/> | <input type="checkbox"/> | <input type="checkbox"/> | <input type="checkbox"/> |
| Alle Mitarbeiter sind zuversichtlich, dass sie mit einer stärkeren Ausrichtung der Patientenversorgung an Teilhabezielen Schritt halten können.                                                                                                      | <input type="checkbox"/>  | <input type="checkbox"/> | <input type="checkbox"/> | <input type="checkbox"/> | <input type="checkbox"/> |
| Alle Mitarbeiter werden alles tun, was nötig ist, damit die Umsetzung der Veränderung gelingen kann.                                                                                                                                                 | <input type="checkbox"/>  | <input type="checkbox"/> | <input type="checkbox"/> | <input type="checkbox"/> | <input type="checkbox"/> |
| Alle Mitarbeiter sind zuversichtlich, dass das SPZ insgesamt (inkl. Geschäftsführung, IT) sie bei der Umsetzung der Veränderung unterstützen wird.                                                                                                   | <input type="checkbox"/>  | <input type="checkbox"/> | <input type="checkbox"/> | <input type="checkbox"/> | <input type="checkbox"/> |
| Alle Mitarbeiter wünschen sich, dass die Veränderung umgesetzt wird.                                                                                                                                                                                 | <input type="checkbox"/>  | <input type="checkbox"/> | <input type="checkbox"/> | <input type="checkbox"/> | <input type="checkbox"/> |
| Alle Mitarbeiter sind zuversichtlich, dass die bei der Umsetzung der Veränderung entstehende Dynamik anhalten wird.                                                                                                                                  | <input type="checkbox"/>  | <input type="checkbox"/> | <input type="checkbox"/> | <input type="checkbox"/> | <input type="checkbox"/> |
| Alle Mitarbeiter sind zuversichtlich, die Herausforderungen bewältigen zu können, die während der Umsetzung der Veränderung aufkommen könnten.                                                                                                       | <input type="checkbox"/>  | <input type="checkbox"/> | <input type="checkbox"/> | <input type="checkbox"/> | <input type="checkbox"/> |
| Alle Mitarbeiter sind entschlossen, die Veränderung umzusetzen.                                                                                                                                                                                      | <input type="checkbox"/>  | <input type="checkbox"/> | <input type="checkbox"/> | <input type="checkbox"/> | <input type="checkbox"/> |
| Alle Mitarbeiter sind zuversichtlich, die im Zuge der Veränderung entstehenden Aufgaben koordinieren zu können.                                                                                                                                      | <input type="checkbox"/>  | <input type="checkbox"/> | <input type="checkbox"/> | <input type="checkbox"/> | <input type="checkbox"/> |
| Alle Mitarbeiter sind motiviert, die Veränderung umzusetzen.                                                                                                                                                                                         | <input type="checkbox"/>  | <input type="checkbox"/> | <input type="checkbox"/> | <input type="checkbox"/> | <input type="checkbox"/> |
| Alle Mitarbeiter sind zuversichtlich, die <b>einrichtungs-politischen</b> Herausforderungen innerhalb der Organisation bewältigen zu können, die die Veränderung mit sich bringt (z.B. abteilungsübergreifende Zusammenarbeit innerhalb der Klinik). | <input type="checkbox"/>  | <input type="checkbox"/> | <input type="checkbox"/> | <input type="checkbox"/> | <input type="checkbox"/> |
| Alle Mitarbeiter sind zuversichtlich, die <b>einrichtungs-übergreifenden</b> Herausforderungen bewältigen zu können, die die Veränderung mit sich bringt (z.B. Zusammenarbeit mit Kindergärten, Schulen).                                            | <input type="checkbox"/>  | <input type="checkbox"/> | <input type="checkbox"/> | <input type="checkbox"/> | <input type="checkbox"/> |

2. Folgende Fragen beziehen sich auf die Kultur in Ihrer Einrichtung. Die Unterpunkte enthalten jeweils vier Beschreibungen. Bitte verteilen Sie 100 Punkte auf vier Beschreibungen, je nachdem, wie gut jede Beschreibung auf Ihre Einrichtung zutrifft. Jede Beschreibung ist anders und keine ist besser oder schlechter als die anderen.

*Zum Beispiel: In Frage 2.1. trifft Beschreibung A sehr gut auf Ihre Einrichtung zu, B trifft etwas zu und C und D treffen überhaupt nicht zu. Sie können der Beschreibung A 70 Punkte und der Beschreibung B 30 Punkte zuordnen.*

A. 70  
B. 30  
C. 0  
D. 0

### 2.1. Meine Einrichtung ...

 Bitte verteilen Sie insgesamt 100 Punkte.

- A. ... hat einen sehr *persönlichen* Charakter. Sie ist wie eine große Familie. Die Mitarbeiter scheinen viel mit einander zu teilen. \_\_\_\_\_
- B. ... ist sehr *dynamisch und unternehmerisch*. Die Mitarbeiter sind bereit, etwas zu wagen. \_\_\_\_\_
- C. ... orientiert sich an *Regeln und ist gut strukturiert*. In der Regel orientieren sich die Handlungen der Mitarbeiter an festgelegten Prozessen und Verfahren. \_\_\_\_\_
- D. ... ist sehr *ergebnisorientiert*. Ein Hauptanliegen besteht darin, die Arbeit zu erledigen. Die Mitarbeiter zeigen kaum persönliches Engagement bei der Umsetzung von Aufgaben. \_\_\_\_\_

Σ 100 Punkte

### 2.2. Die Mitarbeiter sehen in Ihrer SPZ-Leitung ...

 Bitte verteilen Sie insgesamt 100 Punkte.

- A. ... einen Mentor, der seine Mitarbeiter fürsorglich unterstützt. \_\_\_\_\_
- B. ... jemanden, der unternehmerisch, innovativ oder risikofreudig ist. \_\_\_\_\_
- C. ... einen Koordinator, Organisator oder Administrator. \_\_\_\_\_
- D. ... einen Produzenten, Techniker oder Antreiber. \_\_\_\_\_

Σ 100 Punkte

### 2.3. Meine Einrichtung wird zusammengehalten durch...

 Bitte verteilen Sie insgesamt 100 Punkte.

- A. ... Loyalität und Tradition. Der persönliche Einsatz ist groß. \_\_\_\_\_
- B. ... Freude an Innovation und Entwicklung. Nahe am Puls der Zeit zu sein ist sehr wichtig. \_\_\_\_\_
- C. ... formale Regeln und Richtlinien. Hier ist es wichtig reibungslose Abläufe aufrechtzuerhalten. \_\_\_\_\_
- D. ... eine ergebnisorientierte Haltung. Bei den Mitarbeitern stehen Aufgaben und Zielerreichung im Vordergrund. \_\_\_\_\_

Σ 100 Punkte

### 2.4. Meine Einrichtung legt Wert auf...

 Bitte verteilen Sie insgesamt 100 Punkte.

- A. ... menschliche Ressourcen. Mitarbeiterzusammenhalt und Leitkultur sind wichtig. \_\_\_\_\_
- B. ... Wachstum und die Erschließung neuer Arbeits- und Therapiefelder. Die Bereitschaft, sich neuen Herausforderungen zu stellen, ist wichtig. \_\_\_\_\_
- C. ... Beständigkeit und Stabilität. Effiziente und reibungslose Abläufe sind wichtig. \_\_\_\_\_
- D. ... Wettbewerbsfähigkeit und Leistung. Messbare Ziele sind wichtig. \_\_\_\_\_

Σ 100 Punkte

### III. Teilhabeorientierte Versorgung im Arbeitsumfeld SPZ

1. Die **teilhabeorientierte Patientenversorgung durch die Implementierung der ICF-CY** wird auch in den folgenden Aussagen kurz als „**Veränderung**“ bezeichnet.

Bitte schätzen Sie, inwiefern diese Aussagen auf Ihr SPZ zutreffen.

 Bitte machen Sie in jeder Zeile ein Kreuz.

|                                                                                                                   | Trifft überhaupt nicht zu | Trifft eher nicht zu     | Trifft teilweise zu      | Trifft eher zu           | Trifft voll und ganz zu  |
|-------------------------------------------------------------------------------------------------------------------|---------------------------|--------------------------|--------------------------|--------------------------|--------------------------|
| Die Mitarbeiter haben das Gefühl, dass die Veränderung mit den Werten zusammenpasst, die im SPZ gelebt werden.    | <input type="checkbox"/>  | <input type="checkbox"/> | <input type="checkbox"/> | <input type="checkbox"/> | <input type="checkbox"/> |
| Die Mitarbeiter brauchen diese Veränderung im SPZ.                                                                | <input type="checkbox"/>  | <input type="checkbox"/> | <input type="checkbox"/> | <input type="checkbox"/> | <input type="checkbox"/> |
| Die Mitarbeiter glauben, dass diese Veränderung im SPZ unerlässlich ist.                                          | <input type="checkbox"/>  | <input type="checkbox"/> | <input type="checkbox"/> | <input type="checkbox"/> | <input type="checkbox"/> |
| Die Mitarbeiter glauben, dass die Umsetzung dieser Veränderung im SPZ gelingen wird.                              | <input type="checkbox"/>  | <input type="checkbox"/> | <input type="checkbox"/> | <input type="checkbox"/> | <input type="checkbox"/> |
| Die Mitarbeiter betrachten diese Veränderung als zeitgemäß.                                                       | <input type="checkbox"/>  | <input type="checkbox"/> | <input type="checkbox"/> | <input type="checkbox"/> | <input type="checkbox"/> |
| Die Mitarbeiter glauben, dass die Umsetzung dieser Veränderung in einem adäquaten Kosten-Nutzen-Verhältnis steht. | <input type="checkbox"/>  | <input type="checkbox"/> | <input type="checkbox"/> | <input type="checkbox"/> | <input type="checkbox"/> |
| Die Mitarbeiter glauben, dass sich die Gesamtsituation im SPZ durch diese Veränderung verbessern wird.            | <input type="checkbox"/>  | <input type="checkbox"/> | <input type="checkbox"/> | <input type="checkbox"/> | <input type="checkbox"/> |
| Die Mitarbeiter haben das Gefühl, dass die Umsetzung dieser Veränderung eine gute Idee ist.                       | <input type="checkbox"/>  | <input type="checkbox"/> | <input type="checkbox"/> | <input type="checkbox"/> | <input type="checkbox"/> |
| Die Mitarbeiter wertschätzen diese Veränderung.                                                                   | <input type="checkbox"/>  | <input type="checkbox"/> | <input type="checkbox"/> | <input type="checkbox"/> | <input type="checkbox"/> |

### IV. Allgemeine Angaben zur Patientenversorgung

#### 1. Wie viele Patientenkontakte haben Sie derzeit durchschnittlich pro Woche?

Präsenztermine:  |  |  |  , davon dauern:  |  |  |  über 2 Stunden  
 |  |  |  1 bis 2 Stunden  
 |  |  |  unter 1 Stunde

Telefonische/ E-Mail-Kontakte:  |  |  |

#### 2. Wie hoch ist Ihre derzeitige durchschnittliche Gesamtarbeitszeit pro Woche (inklusive evtl. anfallender Überstunden)? | | Stunden

#### 3. Wenn Sie an Ihre durchschnittliche wöchentliche Arbeitszeit im SPZ denken (inklusive evtl. anfallender Überstunden): Wie viele Stunden wenden Sie gegenwärtig für folgende Tätigkeiten auf:

|                                                                                                 |                              |
|-------------------------------------------------------------------------------------------------|------------------------------|
| Die konkrete Arbeit mit Patienten und Eltern?                                                   | <input type="text"/> Stunden |
| Die Therapieplanung (inkl. Vorbereitung und Terminvereinbarung)?                                | <input type="text"/> Stunden |
| Die Dokumentation (z.B. Diagnosen, Befunde, Arztberichte, Bescheinigungen)?                     | <input type="text"/> Stunden |
| Die fallbezogene interdisziplinäre Zusammenarbeit im SPZ (z.B. Fallkonferenzen, runde Tische)?  | <input type="text"/> Stunden |
| Die einrichtungsübergreifende Zusammenarbeit (z.B. mit Jugend-/ Sozialamt)?                     | <input type="text"/> Stunden |
| Die Weiterentwicklung der Versorgung am SPZ (z.B. Arbeitsgruppe zur Umsetzung neuer Standards)? | <input type="text"/> Stunden |



sonstige Tätigkeiten, z.B.: \_\_\_\_\_ Stunden  
 \_\_\_\_\_ Stunden  
 \_\_\_\_\_ Stunden

#### 4. Wie effizient schätzen Sie derzeit ...

 Bitte machen Sie in jeder Zeile ein Kreuz auf der Skala.

[illegible]

5. Bitte denken Sie an das letzte Quartal: Wie hoch war der Anteil Ihrer Patienten und Eltern, die sich ziemlich genau an getroffene Vereinbarungen gehalten haben bezüglich:

 Bitte machen Sie in jeder Zeile ein Kreuz auf der Skala.

Wenn ein Punkt für Ihre Berufsgruppe nicht beurteilbar ist, kreuzen Sie „Kann nicht beurteilen“ an.

|                                                                                                                | 0% | 10% | 20% | 30% | 40% | 50% | 60% | 70% | 80% | 90% | 100% | Kann nicht beurteilen    |
|----------------------------------------------------------------------------------------------------------------|----|-----|-----|-----|-----|-----|-----|-----|-----|-----|------|--------------------------|
| Einnahme verordneter Medikamente?                                                                              |    |     |     |     |     |     |     |     |     |     |      | <input type="checkbox"/> |
| Inanspruchnahme von sonstigen nicht-ärztlichen Leistungen?                                                     |    |     |     |     |     |     |     |     |     |     |      |                          |
| Ergotherapie                                                                                                   |    |     |     |     |     |     |     |     |     |     |      | <input type="checkbox"/> |
| Logopädie                                                                                                      |    |     |     |     |     |     |     |     |     |     |      | <input type="checkbox"/> |
| Physiotherapie                                                                                                 |    |     |     |     |     |     |     |     |     |     |      | <input type="checkbox"/> |
| Sonstige Therapien:                                                                                            |    |     |     |     |     |     |     |     |     |     |      | <input type="checkbox"/> |
| _____<br>Ausstattung mit Hilfsmitteln (z.B. Gehhilfen, Schreibhilfen, Rollstuhl)?                              |    |     |     |     |     |     |     |     |     |     |      | <input type="checkbox"/> |
| Inanspruchnahme von Schulungen bzw. Beratungen (z.B. Elterntraining, Beratung zur Erziehung, sozialen Hilfen)? | 0% | 10% | 20% | 30% | 40% | 50% | 60% | 70% | 80% | 90% | 100% | <input type="checkbox"/> |

## V. Allgemeine Zufriedenheit mit der beruflichen Tätigkeit

 Bitte machen Sie in jeder Zeile ein Kreuz.

|                                                                                    | Stimme überhaupt nicht zu |                          |                          |                          |                          |                          |                          |                          | Stimme voll und ganz zu  |                          |
|------------------------------------------------------------------------------------|---------------------------|--------------------------|--------------------------|--------------------------|--------------------------|--------------------------|--------------------------|--------------------------|--------------------------|--------------------------|
|                                                                                    | 0                         | 1                        | 2                        | 3                        | 4                        | 5                        | 6                        | 7                        | 8                        | 9                        |
| Ich persönlich empfinde meine derzeitige Arbeit im SPZ als lohnend.                | <input type="checkbox"/>  | <input type="checkbox"/> | <input type="checkbox"/> | <input type="checkbox"/> | <input type="checkbox"/> | <input type="checkbox"/> | <input type="checkbox"/> | <input type="checkbox"/> | <input type="checkbox"/> | <input type="checkbox"/> |
| Insgesamt gefällt mir meine Arbeit hier im SPZ.                                    | <input type="checkbox"/>  | <input type="checkbox"/> | <input type="checkbox"/> | <input type="checkbox"/> | <input type="checkbox"/> | <input type="checkbox"/> | <input type="checkbox"/> | <input type="checkbox"/> | <input type="checkbox"/> | <input type="checkbox"/> |
| Insgesamt bin ich mit meiner derzeitigen Arbeit zufrieden.                         | <input type="checkbox"/>  | <input type="checkbox"/> | <input type="checkbox"/> | <input type="checkbox"/> | <input type="checkbox"/> | <input type="checkbox"/> | <input type="checkbox"/> | <input type="checkbox"/> | <input type="checkbox"/> | <input type="checkbox"/> |
| Meine derzeitige Arbeitssituation bietet für mich großen Anlass zur Frustration.   | <input type="checkbox"/>  | <input type="checkbox"/> | <input type="checkbox"/> | <input type="checkbox"/> | <input type="checkbox"/> | <input type="checkbox"/> | <input type="checkbox"/> | <input type="checkbox"/> | <input type="checkbox"/> | <input type="checkbox"/> |
| Meine Arbeit im SPZ entspricht nicht meinen Erwartungen.                           | <input type="checkbox"/>  | <input type="checkbox"/> | <input type="checkbox"/> | <input type="checkbox"/> | <input type="checkbox"/> | <input type="checkbox"/> | <input type="checkbox"/> | <input type="checkbox"/> | <input type="checkbox"/> | <input type="checkbox"/> |
| Ich empfinde meine derzeitige Arbeit im SPZ als sinnstiftend.                      | <input type="checkbox"/>  | <input type="checkbox"/> | <input type="checkbox"/> | <input type="checkbox"/> | <input type="checkbox"/> | <input type="checkbox"/> | <input type="checkbox"/> | <input type="checkbox"/> | <input type="checkbox"/> | <input type="checkbox"/> |
| Meine derzeitige Arbeitssituation ist durch Zeitdruck geprägt.                     | <input type="checkbox"/>  | <input type="checkbox"/> | <input type="checkbox"/> | <input type="checkbox"/> | <input type="checkbox"/> | <input type="checkbox"/> | <input type="checkbox"/> | <input type="checkbox"/> | <input type="checkbox"/> | <input type="checkbox"/> |
| Meine derzeitige Arbeitssituation ist durch Kostendruck geprägt.                   | <input type="checkbox"/>  | <input type="checkbox"/> | <input type="checkbox"/> | <input type="checkbox"/> | <input type="checkbox"/> | <input type="checkbox"/> | <input type="checkbox"/> | <input type="checkbox"/> | <input type="checkbox"/> | <input type="checkbox"/> |
| In meiner Arbeit kann ich viele Entscheidungen selbst treffen.                     | <input type="checkbox"/>  | <input type="checkbox"/> | <input type="checkbox"/> | <input type="checkbox"/> | <input type="checkbox"/> | <input type="checkbox"/> | <input type="checkbox"/> | <input type="checkbox"/> | <input type="checkbox"/> | <input type="checkbox"/> |
| Ich habe sehr wenig Entscheidungsspielraum darüber, wie ich meine Arbeit erledige. | <input type="checkbox"/>  | <input type="checkbox"/> | <input type="checkbox"/> | <input type="checkbox"/> | <input type="checkbox"/> | <input type="checkbox"/> | <input type="checkbox"/> | <input type="checkbox"/> | <input type="checkbox"/> | <input type="checkbox"/> |

## VI. Angaben zu Ihrer Person

### 1. Ihr Geschlecht

☐ Männlich ☐ Weiblich

### 2. Bitte geben Sie an, in welchem Fachbereich Sie tätig sind:

- |                                                        |                                           |
|--------------------------------------------------------|-------------------------------------------|
| <input type="checkbox"/> Kinderheilkunde               | <input type="checkbox"/> Psychotherapie   |
| <input type="checkbox"/> Kinder- und Jugendpsychiatrie | <input type="checkbox"/> Ergotherapie     |
| <input type="checkbox"/> Pädagogik                     | <input type="checkbox"/> Physiotherapie   |
| <input type="checkbox"/> Heilpädagogik                 | <input type="checkbox"/> Logopädie        |
| <input type="checkbox"/> Psychologie                   | <input type="checkbox"/> Sonstiges: _____ |

3. Ihre Erfahrung in Ihrem derzeitigen Fachbereich: \_\_\_\_\_ |\_\_|\_\_| Jahre

### 4. Bitte geben Sie Ihren höchsten beruflichen Ausbildungsabschluss an:

- |                                                         |                                                                             |
|---------------------------------------------------------|-----------------------------------------------------------------------------|
| <input type="checkbox"/> Promotion                      | <input type="checkbox"/> Beruflich-schulische Ausbildung (Berufsfachschule) |
| <input type="checkbox"/> Master/ Magister/ Staatsexamen | <input type="checkbox"/> Beruflich-betriebliche Berufsausbildung (Lehre)    |
| <input type="checkbox"/> Diplom                         | <input type="checkbox"/> Sonstiges: _____                                   |
| <input type="checkbox"/> Bachelor, Diplom FH            |                                                                             |

## 5. Haben Sie die ICF-CY in der Vergangenheit bereits angewendet?

- |                                                                      |                                                               |
|----------------------------------------------------------------------|---------------------------------------------------------------|
| <input type="checkbox"/> Nein                                        | <input type="checkbox"/> Ich wende die ICF-CY gelegentlich an |
| <input type="checkbox"/> Ich habe von der ICF-CY schon einmal gehört | <input type="checkbox"/> Ich wende die ICF-CY regelmäßig an   |
| <input type="checkbox"/> Ich habe die ICF-CY schon einmal angewendet | <input type="checkbox"/> Ich wende die ICF-CY immer an        |

 Bitte beschreiben Sie hier kurz Ihre bisherigen Erfahrungen mit der ICF-CY

## 6. Sind Sie außerhalb der Patientenversorgung mit weiteren (formellen oder informellen) Aufgaben im SPZ betraut?

(z.B. Sprecherin einer Arbeitsgruppe, Organisation bzw. Aufbau eines neuen Bereichs, Supervision von EEG)

- ☐ Ja, und zwar:
- ☐ Nein

## Zum Schluss geben Sie bitte Ihren Code an, den Sie gewählt haben

|  |  |  |  |  |  |  |  |
|--|--|--|--|--|--|--|--|
|  |  |  |  |  |  |  |  |
|--|--|--|--|--|--|--|--|

### Zur Erinnerung:

In die ersten zwei Kästchen notieren Sie die **zwei letzten Buchstaben des ersten Vornamens Ihrer Mutter**.

In die nächsten zwei Kästchen notieren Sie die **zwei letzten Buchstaben des Nachnamens Ihrer Mutter**.

In die folgenden zwei Kästchen notieren Sie **den Geburtstag Ihrer Mutter**.

In die letzten zwei Kästchen notieren Sie **den Geburtsmonat Ihrer Mutter**.

**Beispiel:** Ihre Mutter heißt Petra Johanna Musterfrau. Ihre Mutter hat am **09.04.** Geburtstag.

Der Code lautet daher: 

|   |   |   |   |   |   |   |   |
|---|---|---|---|---|---|---|---|
| R | A | A | U | 0 | 9 | 0 | 4 |
|---|---|---|---|---|---|---|---|

# Vielen Dank für Ihre Teilnahme!

Bitte geben Sie den ausgefüllten Fragebogen **in den beiliegenden Umschlag, verschließen Sie diesen und legen Sie ihn in die dafür vorgesehene Kiste in Ihrem SPZ-Sekretariat**. Die Fragebögen werden dann gesammelt an das Projektteam weitergeleitet. Ihre Daten werden nur von den Projektmitarbeitern weiterverarbeitet. Die Auswertung erfolgt aggregiert, sodass keine Rückschlüsse auf Ihre Person möglich sind.

[illegible]

## 2. Bitte geben Sie an, **wie gut Sie in der Regel folgende Aspekte** in Ihrer Arbeit mit Patienten bzw. Eltern **umsetzen können**.

 Bitte machen Sie in jeder Zeile ein Kreuz. Wenn Sie als Fachkraft nur mit Kleinkindern bzw. mit schwerbehinderten Patienten arbeiten, kreuzen Sie bitte „nicht zutreffend“ an.

| <b>Patienten</b>                                                                            | Überhaupt nicht gut      |                          |                          |                          |                          |                          |                          |                          |                          |                          | Sehr gut | Nicht zutreffend         |
|---------------------------------------------------------------------------------------------|--------------------------|--------------------------|--------------------------|--------------------------|--------------------------|--------------------------|--------------------------|--------------------------|--------------------------|--------------------------|----------|--------------------------|
|                                                                                             | 0                        | 1                        | 2                        | 3                        | 4                        | 5                        | 6                        | 7                        | 8                        | 9                        |          |                          |
| ... bekommen stets klare Informationen.                                                     | <input type="checkbox"/> |          | <input type="checkbox"/> |
| ... bekommen immer Gelegenheit Fragen zu stellen.                                           | <input type="checkbox"/> |          | <input type="checkbox"/> |
| ... äußern ihre Meinungen.                                                                  | <input type="checkbox"/> |          | <input type="checkbox"/> |
| ... werden stets in die Besprechung von Versorgungs- bzw. Therapieoptionen einbezogen.      | <input type="checkbox"/> |          | <input type="checkbox"/> |
| ... werden gleichberechtigt an Entscheidungen über ihre Versorgung bzw. Therapie beteiligt. | <input type="checkbox"/> |          | <input type="checkbox"/> |
| ... übernehmen die Verantwortung für ihre Gesundheit.                                       | <input type="checkbox"/> |          | <input type="checkbox"/> |

| <b>Eltern</b>                                                                                           | Überhaupt nicht gut      |                          |                          |                          |                          |                          |                          |                          |                          |                          | Sehr gut |
|---------------------------------------------------------------------------------------------------------|--------------------------|--------------------------|--------------------------|--------------------------|--------------------------|--------------------------|--------------------------|--------------------------|--------------------------|--------------------------|----------|
|                                                                                                         | 0                        | 1                        | 2                        | 3                        | 4                        | 5                        | 6                        | 7                        | 8                        | 9                        |          |
| ... bekommen stets klare Informationen.                                                                 | <input type="checkbox"/> |          |
| ... bekommen immer Gelegenheit Fragen zu stellen.                                                       | <input type="checkbox"/> |          |
| ... äußern ihre Meinungen.                                                                              | <input type="checkbox"/> |          |
| ... werden stets in die Besprechung von Versorgungs- bzw. Therapieoptionen einbezogen.                  | <input type="checkbox"/> |          |
| ... werden gleichberechtigt an Entscheidungen über die Versorgung bzw. Therapie ihrer Kinder beteiligt. | <input type="checkbox"/> |          |
| ... übernehmen die Verantwortung für die Gesundheit ihrer Kinder.                                       | <input type="checkbox"/> |          |

## 3. Welche Barrieren **erschweren** Ihrer Meinung nach die **Patienten- und Elternzentrierung** in Ihrem beruflichen Alltag?

 Bitte nennen Sie drei aus Ihrer Sicht gravierende Barrieren. Stichpunkte reichen aus.

1.

2.

3.

## II. Merkmale des Arbeitsumfelds SPZ

1. Eines der Ziele des Projekts PART-CHILD ist die Umsetzung **einer teilhabeorientierten Patientenversorgung durch die Implementierung der ICF-CY in Ihrem SPZ**. Die teilhabeorientierte Patientenversorgung wird in den folgenden Aussagen kurz als „**Veränderung**“ bezeichnet.

Bitte schätzen Sie, inwiefern diese Aussagen auf Sie als SPZ-Leitung bzw. auf alle SPZ-Mitarbeiter zutreffen werden.

 Bitte machen Sie in jeder Zeile ein Kreuz.

|                                                                                                                                                                                   | Trifft<br>überhaupt<br>nicht zu | Trifft eher<br>nicht zu  | Trifft<br>teilweise<br>zu | Trifft<br>eher<br>zu     | Trifft voll<br>und ganz<br>zu |
|-----------------------------------------------------------------------------------------------------------------------------------------------------------------------------------|---------------------------------|--------------------------|---------------------------|--------------------------|-------------------------------|
| Sie als SPZ-Leitung können die Mitarbeiter zur Umsetzung der Veränderung motivieren.                                                                                              | <input type="checkbox"/>        | <input type="checkbox"/> | <input type="checkbox"/>  | <input type="checkbox"/> | <input type="checkbox"/>      |
| Es ist Ihnen als SPZ-Leitung eines der wichtigsten Anliegen, dass die Veränderung umgesetzt wird.                                                                                 | <input type="checkbox"/>        | <input type="checkbox"/> | <input type="checkbox"/>  | <input type="checkbox"/> | <input type="checkbox"/>      |
| Sie als SPZ-Leitung haben alle notwendigen Ressourcen (z.B. Erfahrung, organisationale Gegebenheiten), damit die Veränderung in Ihrem SPZ umgesetzt werden kann.                  | <input type="checkbox"/>        | <input type="checkbox"/> | <input type="checkbox"/>  | <input type="checkbox"/> | <input type="checkbox"/>      |
| Alle Mitarbeiter werden sich bei der Umsetzung der Veränderung engagieren.                                                                                                        | <input type="checkbox"/>        | <input type="checkbox"/> | <input type="checkbox"/>  | <input type="checkbox"/> | <input type="checkbox"/>      |
| Alle Mitarbeiter sind zuversichtlich, dass sie mit einer stärkeren Ausrichtung der Patientenversorgung an Teilhabezielen Schritt halten können.                                   | <input type="checkbox"/>        | <input type="checkbox"/> | <input type="checkbox"/>  | <input type="checkbox"/> | <input type="checkbox"/>      |
| Alle Mitarbeiter werden alles tun, was nötig ist, damit die Umsetzung der Veränderung gelingen kann.                                                                              | <input type="checkbox"/>        | <input type="checkbox"/> | <input type="checkbox"/>  | <input type="checkbox"/> | <input type="checkbox"/>      |
| Alle Mitarbeiter sind zuversichtlich, dass ihre Organisation insgesamt (inkl. Geschäftsführung, IT) sie bei der Umsetzung der Veränderung unterstützen wird.                      | <input type="checkbox"/>        | <input type="checkbox"/> | <input type="checkbox"/>  | <input type="checkbox"/> | <input type="checkbox"/>      |
| Alle Mitarbeiter sind zuversichtlich, dass alle notwendigen Ressourcen zur Verfügung stehen (z.B. Know-How, Erfahrung, Zeit), damit die Veränderung im SPZ umgesetzt werden kann. | <input type="checkbox"/>        | <input type="checkbox"/> | <input type="checkbox"/>  | <input type="checkbox"/> | <input type="checkbox"/>      |
| Alle Mitarbeiter wünschen sich, dass die Veränderung umgesetzt wird.                                                                                                              | <input type="checkbox"/>        | <input type="checkbox"/> | <input type="checkbox"/>  | <input type="checkbox"/> | <input type="checkbox"/>      |
| Alle Mitarbeiter sind zuversichtlich, dass die bei der Umsetzung der Veränderung entstehende Dynamik anhalten wird.                                                               | <input type="checkbox"/>        | <input type="checkbox"/> | <input type="checkbox"/>  | <input type="checkbox"/> | <input type="checkbox"/>      |
| Alle Mitarbeiter sind zuversichtlich, die Herausforderungen bewältigen zu können, die während der Umsetzung der Veränderung aufkommen könnten.                                    | <input type="checkbox"/>        | <input type="checkbox"/> | <input type="checkbox"/>  | <input type="checkbox"/> | <input type="checkbox"/>      |
| Alle Mitarbeiter sind entschlossen, die Veränderung umzusetzen.                                                                                                                   | <input type="checkbox"/>        | <input type="checkbox"/> | <input type="checkbox"/>  | <input type="checkbox"/> | <input type="checkbox"/>      |
| Alle Mitarbeiter sind zuversichtlich, die im Zuge der Veränderung entstehenden Aufgaben koordinieren zu können.                                                                   | <input type="checkbox"/>        | <input type="checkbox"/> | <input type="checkbox"/>  | <input type="checkbox"/> | <input type="checkbox"/>      |
| Alle Mitarbeiter sind motiviert, die Veränderung umzusetzen.                                                                                                                      | <input type="checkbox"/>        | <input type="checkbox"/> | <input type="checkbox"/>  | <input type="checkbox"/> | <input type="checkbox"/>      |

|  | Trifft<br>überhaupt<br>nicht zu | Trifft eher<br>nicht zu | Trifft<br>teilweise<br>zu | Trifft<br>eher<br>zu | Trifft voll<br>und ganz<br>zu |
|--|---------------------------------|-------------------------|---------------------------|----------------------|-------------------------------|
|--|---------------------------------|-------------------------|---------------------------|----------------------|-------------------------------|

Alle Mitarbeiter sind zuversichtlich, die **einrichtungs-politischen** Herausforderungen innerhalb der Organisation bewältigen zu können, die die Veränderung mit sich bringt (z.B. abteilungsübergreifende Zusammenarbeit innerhalb der Klinik).

☐ ☐ ☐ ☐ ☐

Alle Mitarbeiter sind zuversichtlich, die **einrichtungs-übergreifenden** Herausforderungen bewältigen zu können, die die Veränderung mit sich bringt (z.B. Zusammenarbeit mit Kindergärten, Schulen).

☐ ☐ ☐ ☐ ☐

Der Geschäftsführung ist es ein Anliegen, dass die Veränderung umgesetzt wird.

☐ ☐ ☐ ☐ ☐

Die übergeordneten Ebenen (z.B. Geschäftsführung, Verwaltung) unterstützen die Umsetzung der Veränderung.

☐ ☐ ☐ ☐ ☐

Der IT-Bereich unterstützt die Umsetzung der Veränderung.

☐ ☐ ☐ ☐ ☐

2. Folgende Fragen beziehen sich auf die Kultur in Ihrer Einrichtung. Die Unterpunkte enthalten jeweils vier Beschreibungen. Bitte verteilen Sie 100 Punkte auf vier Beschreibungen, je nachdem, wie gut jede Beschreibung auf Ihre Einrichtung zutrifft. Jede Beschreibung ist anders und keine ist besser oder schlechter als die anderen.

*Zum Beispiel: In Frage 2.1. trifft Beschreibung A sehr gut auf Ihre Einrichtung zu, B trifft etwas zu und C und D treffen überhaupt nicht zu. Sie können der Beschreibung A 70 Punkte und der Beschreibung B 30 Punkte zuordnen.*

A. 70

B. 30

C. 0

D. 0

### 2.1. Meine Einrichtung ...

 Bitte verteilen Sie insgesamt 100 Punkte.

- A. ... hat einen sehr *persönlichen* Charakter. Sie ist wie eine große Familie. Die Mitarbeiter scheinen viel mit einander zu teilen. \_\_\_\_\_
- B. ... ist sehr *dynamisch und unternehmerisch*. Die Mitarbeiter sind bereit, etwas zu wagen. \_\_\_\_\_
- C. ... orientiert sich an *Regeln und ist gut strukturiert*. In der Regel orientieren sich die Handlungen der Mitarbeiter an festgelegten Prozessen und Verfahren. \_\_\_\_\_
- D. ... ist sehr *ergebnisorientiert*. Ein Hauptanliegen besteht darin, die Arbeit zu erledigen. Die Mitarbeiter zeigen kaum persönliches Engagement bei der Umsetzung von Aufgaben. \_\_\_\_\_

Σ 100 Punkte

### 2.2. Die Mitarbeiter sehen in Ihrer SPZ-Leitung ...

 Bitte verteilen Sie insgesamt 100 Punkte.

- A. ... einen Mentor, der seine Mitarbeiter fürsorglich unterstützt. \_\_\_\_\_
- B. ... jemanden, der unternehmerisch, innovativ oder risikofreudig ist. \_\_\_\_\_
- C. ... einen Koordinator, Organisator oder Administrator. \_\_\_\_\_
- D. ... einen Produzenten, Techniker oder Antreiber. \_\_\_\_\_

Σ 100 Punkte

### 2.3. Meine Einrichtung wird zusammengehalten durch...

 Bitte verteilen Sie insgesamt 100 Punkte.

- A. ... Loyalität und Tradition. Der persönliche Einsatz ist groß. \_\_\_\_\_

- B. ... Freude an Innovation und Entwicklung. Am Puls der Zeit zu sein ist sehr wichtig. \_\_\_\_\_
- C. ... formale Regeln und Richtlinien. Hier ist es wichtig reibungslose Abläufe aufrechtzuerhalten. \_\_\_\_\_
- D. ... eine ergebnisorientierte Haltung. Bei den Mitarbeitern stehen Aufgaben und Zielerreichung im Vordergrund. \_\_\_\_\_

Σ 100 Punkte

#### 2.4. Meine Einrichtung legt Wert auf...

 Bitte verteilen Sie insgesamt 100 Punkte.

- A. ... menschliche Ressourcen. Mitarbeiterzusammenhalt und Leitkultur sind wichtig. \_\_\_\_\_
- B. ... Innovation und die Erschließung neuer Arbeits- und Therapiefelder. Die Bereitschaft, sich neuen Herausforderungen zu stellen, ist wichtig. \_\_\_\_\_
- C. ... Beständigkeit und Stabilität. Effiziente und reibungslose Abläufe sind wichtig. \_\_\_\_\_
- D. ... Wettbewerbsfähigkeit und Leistung. Messbare Ziele sind wichtig. \_\_\_\_\_

Σ 100 Punkte

### 3. Wie viele Fachkräfte, die diagnostisch, therapeutisch oder beratend tätig sind, sind derzeit in Ihrem SPZ angestellt?

 Bitte geben Sie die Anzahl a) in Köpfen und b) in Vollzeitäquivalenten (VÄ) an, z.B. 3 Köpfe und 2,5 VÄ für 2 Vollzeitkräfte und eine 50%-Kraft

|                                             | Köpfe | VÄ    |                                                               | Köpfe | VÄ    |
|---------------------------------------------|-------|-------|---------------------------------------------------------------|-------|-------|
| Fachärzte für Kinder- und Jugendmedizin     | _____ | _____ | Logopäden                                                     | _____ | _____ |
| Fachärzte für Kinder- und Jugendpsychiatrie | _____ | _____ | Heilpädagogen                                                 | _____ | _____ |
| Assistenzärzte in Weiterbildung             | _____ | _____ | Pädagogen                                                     | _____ | _____ |
| Psychologen                                 | _____ | _____ | Psychotherapeuten                                             | _____ | _____ |
| Physiotherapeuten                           | _____ | _____ | weitere Therapeuten insgesamt (z.B. Motologie, Musiktherapie) | _____ | _____ |
| Ergotherapeuten                             | _____ | _____ |                                                               |       |       |

### III. Teilhabeorientierte Versorgung im Arbeitsumfeld SPZ

1. Die teilhabeorientierte Patientenversorgung durch die Implementierung der ICF-CY wird auch in den folgenden Aussagen kurz als „Veränderung“ bezeichnet.

Bitte schätzen Sie, inwiefern diese Aussagen auf Ihr SPZ zutreffen.

 Bitte machen Sie in jeder Zeile ein Kreuz.

|                                                                                                                        | Trifft überhaupt nicht zu | Trifft eher nicht zu     | Trifft teilweise zu      | Trifft eher zu           | Trifft voll und ganz zu  |
|------------------------------------------------------------------------------------------------------------------------|---------------------------|--------------------------|--------------------------|--------------------------|--------------------------|
| Die Mitarbeiter haben das Gefühl, dass die Veränderung mit den Werten zusammenpasst, die an unserem SPZ gelebt werden. | <input type="checkbox"/>  | <input type="checkbox"/> | <input type="checkbox"/> | <input type="checkbox"/> | <input type="checkbox"/> |
| Die Mitarbeiter brauchen diese Veränderung im SPZ.                                                                     | <input type="checkbox"/>  | <input type="checkbox"/> | <input type="checkbox"/> | <input type="checkbox"/> | <input type="checkbox"/> |

|                                                                          | Trifft überhaupt nicht zu | Trifft eher nicht zu     | Trifft teilweise zu      | Trifft eher zu           | Trifft voll und ganz zu  |
|--------------------------------------------------------------------------|---------------------------|--------------------------|--------------------------|--------------------------|--------------------------|
| Die Mitarbeiter glauben, dass diese Veränderung im SPZ unerlässlich ist. | <input type="checkbox"/>  | <input type="checkbox"/> | <input type="checkbox"/> | <input type="checkbox"/> | <input type="checkbox"/> |



|                                                                                                                   |                          |                          |                          |                          |                          |
|-------------------------------------------------------------------------------------------------------------------|--------------------------|--------------------------|--------------------------|--------------------------|--------------------------|
| Die Mitarbeiter glauben, dass die Umsetzung dieser Veränderung im SPZ gelingen wird.                              | <input type="checkbox"/> |
| Die Mitarbeiter betrachten diese Veränderung als zeitgemäß.                                                       | <input type="checkbox"/> |
| Die Mitarbeiter glauben, dass die Umsetzung dieser Veränderung in einem adäquaten Kosten-Nutzen-Verhältnis steht. | <input type="checkbox"/> |
| Die Mitarbeiter glauben, dass sich die Gesamtsituation im SPZ durch diese Veränderung verbessern wird.            | <input type="checkbox"/> |
| Die Mitarbeiter haben das Gefühl, dass die Umsetzung dieser Veränderung eine gute Idee ist.                       | <input type="checkbox"/> |
| Die Mitarbeiter wertschätzen diese Veränderung.                                                                   | <input type="checkbox"/> |

#### IV. Allgemeine Zufriedenheit mit der beruflichen Tätigkeit

 Bitte machen Sie in jeder Zeile ein Kreuz.

|                                                                                    | Stimme überhaupt nicht zu |                          |                          |                          |                          |                          |                          |                          |                          | Stimme voll und ganz zu  |  |
|------------------------------------------------------------------------------------|---------------------------|--------------------------|--------------------------|--------------------------|--------------------------|--------------------------|--------------------------|--------------------------|--------------------------|--------------------------|--|
|                                                                                    | 0                         | 1                        | 2                        | 3                        | 4                        | 5                        | 6                        | 7                        | 8                        | 9                        |  |
| Ich persönlich empfinde meine derzeitige Arbeit im SPZ als lohnend.                | <input type="checkbox"/>  | <input type="checkbox"/> | <input type="checkbox"/> | <input type="checkbox"/> | <input type="checkbox"/> | <input type="checkbox"/> | <input type="checkbox"/> | <input type="checkbox"/> | <input type="checkbox"/> | <input type="checkbox"/> |  |
| Insgesamt gefällt mir meine Arbeit hier im SPZ.                                    | <input type="checkbox"/>  | <input type="checkbox"/> | <input type="checkbox"/> | <input type="checkbox"/> | <input type="checkbox"/> | <input type="checkbox"/> | <input type="checkbox"/> | <input type="checkbox"/> | <input type="checkbox"/> | <input type="checkbox"/> |  |
| Insgesamt bin ich mit meiner derzeitigen Arbeit zufrieden.                         | <input type="checkbox"/>  | <input type="checkbox"/> | <input type="checkbox"/> | <input type="checkbox"/> | <input type="checkbox"/> | <input type="checkbox"/> | <input type="checkbox"/> | <input type="checkbox"/> | <input type="checkbox"/> | <input type="checkbox"/> |  |
| Meine derzeitige Arbeitssituation bietet für mich großen Anlass zur Frustration.   | <input type="checkbox"/>  | <input type="checkbox"/> | <input type="checkbox"/> | <input type="checkbox"/> | <input type="checkbox"/> | <input type="checkbox"/> | <input type="checkbox"/> | <input type="checkbox"/> | <input type="checkbox"/> | <input type="checkbox"/> |  |
| Meine Arbeit im SPZ entspricht nicht meinen Erwartungen.                           | <input type="checkbox"/>  | <input type="checkbox"/> | <input type="checkbox"/> | <input type="checkbox"/> | <input type="checkbox"/> | <input type="checkbox"/> | <input type="checkbox"/> | <input type="checkbox"/> | <input type="checkbox"/> | <input type="checkbox"/> |  |
| Ich empfinde meine derzeitige Arbeit im SPZ als sinnstiftend.                      | <input type="checkbox"/>  | <input type="checkbox"/> | <input type="checkbox"/> | <input type="checkbox"/> | <input type="checkbox"/> | <input type="checkbox"/> | <input type="checkbox"/> | <input type="checkbox"/> | <input type="checkbox"/> | <input type="checkbox"/> |  |
| Meine derzeitige Arbeitssituation ist durch Zeitdruck geprägt.                     | <input type="checkbox"/>  | <input type="checkbox"/> | <input type="checkbox"/> | <input type="checkbox"/> | <input type="checkbox"/> | <input type="checkbox"/> | <input type="checkbox"/> | <input type="checkbox"/> | <input type="checkbox"/> | <input type="checkbox"/> |  |
| Meine derzeitige Arbeitssituation ist durch Kostendruck geprägt.                   | <input type="checkbox"/>  | <input type="checkbox"/> | <input type="checkbox"/> | <input type="checkbox"/> | <input type="checkbox"/> | <input type="checkbox"/> | <input type="checkbox"/> | <input type="checkbox"/> | <input type="checkbox"/> | <input type="checkbox"/> |  |
| In meiner Arbeit kann ich viele Entscheidungen selbst treffen.                     | <input type="checkbox"/>  | <input type="checkbox"/> | <input type="checkbox"/> | <input type="checkbox"/> | <input type="checkbox"/> | <input type="checkbox"/> | <input type="checkbox"/> | <input type="checkbox"/> | <input type="checkbox"/> | <input type="checkbox"/> |  |
| Ich habe sehr wenig Entscheidungsspielraum darüber, wie ich meine Arbeit erledige. | <input type="checkbox"/>  | <input type="checkbox"/> | <input type="checkbox"/> | <input type="checkbox"/> | <input type="checkbox"/> | <input type="checkbox"/> | <input type="checkbox"/> | <input type="checkbox"/> | <input type="checkbox"/> | <input type="checkbox"/> |  |

#### V. Ihre Erfahrungen mit Veränderungsprozessen

1. Welche Qualifizierungsmaßnahmen, die die Personal- bzw. Organisationsentwicklung betreffen, haben Sie als Leitung bislang in Anspruch genommen (z.B. Fortbildung zu Personalführung, Change Management)?

#### VI. Allgemeine Angaben zur Patientenversorgung an Ihrem SPZ

1. Ist an Ihr SPZ eine Frühförderstelle angegliedert?

☐ Nein

☐ Ja

**2. Wie viele Überweisungsscheine wurden an Ihrem SPZ im Jahr 2018 insgesamt eingelöst?**

|\_|\_|\_|\_| Überweisungsscheine

**3. Wie hoch ist die durchschnittliche Anzahl der Eltern-Patienten-Fachkraftkontakte pro Überweisungsschein an Ihrem SPZ?**

|\_|\_| Kontakte

**4. Gibt es an Ihrem SPZ Vorgaben bezüglich der Termindauer je nach Berufsgruppe der Fachkräfte?**

☐ Nein

☐ Ja

 Bitte fassen Sie diese Vorgaben im folgenden Feld kurz zusammen.

**5. Erhält Ihr SPZ neben den Mitteln der Vergütung durch die gesetzliche Krankenversicherung zusätzliche finanzielle Mittel?**

(z.B. von Stiftungen, kommunalen Trägern)

☐ Nein

☐ Ja, und zwar für geschätzt |\_|\_| % der Patienten

**6. Bitte schätzen Sie: Wie viel Prozent der Patienten, die an Ihrem SPZ betreut werden, ...**

 Bitte machen Sie in jeder Zeile ein Kreuz auf der Skala.

|                                                              | 0%          | 10% | 20% | 30% | 40% | 50% | 60% | 70% | 80% | 90% | 100% |
|--------------------------------------------------------------|-------------|-----|-----|-----|-----|-----|-----|-----|-----|-----|------|
| ... sind über ihre Eltern privat versichert?                 | <div></div> |     |     |     |     |     |     |     |     |     |      |
| ... sind über ihre Eltern bei der AOK versichert?            | <div></div> |     |     |     |     |     |     |     |     |     |      |
| ... sind über ihre Eltern bei der TK versichert?             | <div></div> |     |     |     |     |     |     |     |     |     |      |
| ... sind über ihre Eltern bei der DAK versichert?            | <div></div> |     |     |     |     |     |     |     |     |     |      |
| ... werden mit ihren Familien über das Jugendamt mitbetreut? | 0%          | 10% | 20% | 30% | 40% | 50% | 60% | 70% | 80% | 90% | 100% |

**7. Bitte schätzen Sie: Wie viel Prozent der Patienten, die an Ihrem SPZ betreut werden, ...**

 Bitte machen Sie in jeder Zeile ein Kreuz auf der Skala.

|                                                                                                    | 0%          | 10% | 20% | 30% | 40% | 50% | 60% | 70% | 80% | 90% | 100% |
|----------------------------------------------------------------------------------------------------|-------------|-----|-----|-----|-----|-----|-----|-----|-----|-----|------|
| ... sind zwischen 0 und 2 Jahre alt?                                                               | <div></div> |     |     |     |     |     |     |     |     |     |      |
| ... sind 7 Jahre alt oder älter?                                                                   | <div></div> |     |     |     |     |     |     |     |     |     |      |
| ... sind körperlich zu schwer beeinträchtigt, um einen einfachen Fragebogen beantworten zu können? | <div></div> |     |     |     |     |     |     |     |     |     |      |
| ... sind geistig zu schwer beeinträchtigt, um einen einfachen Fragebogen beantworten zu können?    | 0%          | 10% | 20% | 30% | 40% | 50% | 60% | 70% | 80% | 90% | 100% |
| ... sind sowohl körperlich als auch geistig zu schwer beeinträchtigt, um einen                     | <div></div> |     |     |     |     |     |     |     |     |     |      |

einfachen Fragebogen beantworten zu können?

... werden voraussichtlich nicht über die nächsten 2 Jahre regelmäßig am SPZ betreut?

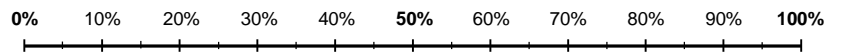

## 8. Bitte schätzen Sie: Wie viel Prozent der Eltern, deren Kinder an Ihrem SPZ betreut werden,...

 Bitte machen Sie in jeder Zeile ein Kreuz auf der Skala.

... sprechen nicht ausreichend deutsch, um einen einfachen Fragebogen beantworten zu können?

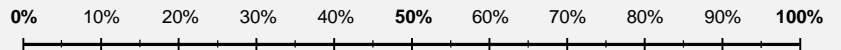

... benötigen zusätzliche externe soziale und familiäre Unterstützung (z.B. Erziehungsberatung, Frühe Hilfen, Teilnahme an speziellen sozialen Programmen außerhalb des Jugendamtes wie Müttercafé, Sprachprogramme, Patenschaften)

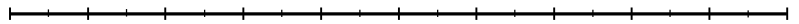

... haben eine psychiatrische Erkrankung (z.B. Suchterkrankung)?

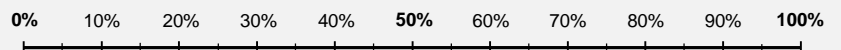

## 9. Wie effizient schätzen Sie derzeit ...

 Bitte machen Sie in jeder Zeile ein Kreuz.

|                                                                                                                                                                            | Überhaupt nicht effizient |                          |                          |                          |                          |                          |                          |                          |                          | Sehr effizient           |  |
|----------------------------------------------------------------------------------------------------------------------------------------------------------------------------|---------------------------|--------------------------|--------------------------|--------------------------|--------------------------|--------------------------|--------------------------|--------------------------|--------------------------|--------------------------|--|
|                                                                                                                                                                            | 0                         | 1                        | 2                        | 3                        | 4                        | 5                        | 6                        | 7                        | 8                        | 9                        |  |
| ... die konkrete Arbeit mit Patienten und Eltern in Ihrem SPZ ein?                                                                                                         | <input type="checkbox"/>  | <input type="checkbox"/> | <input type="checkbox"/> | <input type="checkbox"/> | <input type="checkbox"/> | <input type="checkbox"/> | <input type="checkbox"/> | <input type="checkbox"/> | <input type="checkbox"/> | <input type="checkbox"/> |  |
| ... die Therapieplanung (inkl. Vorbereitung und Terminvereinbarung) ein?                                                                                                   | <input type="checkbox"/>  | <input type="checkbox"/> | <input type="checkbox"/> | <input type="checkbox"/> | <input type="checkbox"/> | <input type="checkbox"/> | <input type="checkbox"/> | <input type="checkbox"/> | <input type="checkbox"/> | <input type="checkbox"/> |  |
| ... die Dokumentation in Ihrem SPZ ein?                                                                                                                                    | <input type="checkbox"/>  | <input type="checkbox"/> | <input type="checkbox"/> | <input type="checkbox"/> | <input type="checkbox"/> | <input type="checkbox"/> | <input type="checkbox"/> | <input type="checkbox"/> | <input type="checkbox"/> | <input type="checkbox"/> |  |
| ... die <b>fallbezogene</b> interdisziplinäre Zusammenarbeit in Ihrem SPZ ein?                                                                                             | <input type="checkbox"/>  | <input type="checkbox"/> | <input type="checkbox"/> | <input type="checkbox"/> | <input type="checkbox"/> | <input type="checkbox"/> | <input type="checkbox"/> | <input type="checkbox"/> | <input type="checkbox"/> | <input type="checkbox"/> |  |
| ... die <b>fallunabhängige</b> interdisziplinäre Zusammenarbeit in Ihrem SPZ (z.B. Erweiterung von Therapiestandards, Standards in Betrachtung von Krankheitsbildern) ein? | <input type="checkbox"/>  | <input type="checkbox"/> | <input type="checkbox"/> | <input type="checkbox"/> | <input type="checkbox"/> | <input type="checkbox"/> | <input type="checkbox"/> | <input type="checkbox"/> | <input type="checkbox"/> | <input type="checkbox"/> |  |
| ... die <b>einrichtungsübergreifende</b> Zusammenarbeit (z.B. Kinderärzte, Jugend-/Sozialamt, Frühförderstellen) ein?                                                      | <input type="checkbox"/>  | <input type="checkbox"/> | <input type="checkbox"/> | <input type="checkbox"/> | <input type="checkbox"/> | <input type="checkbox"/> | <input type="checkbox"/> | <input type="checkbox"/> | <input type="checkbox"/> | <input type="checkbox"/> |  |

## VII. Angaben zu Ihrer Person

### 1. Ihr Geschlecht

☐ Männlich ☐ Weiblich

### 2. Welche Fachrichtung haben Sie?

### 3. Welche (Zusatz-)Weiterbildungen haben Sie absolviert?

---

### 4. Ihre Erfahrung in Ihrem derzeitigen Fachbereich:

|\_|\_| Jahre

### 5. Seit wann leiten Sie dieses SPZ?

Seit: |\_|\_|\_|\_|

### 6. Wie hoch ist Ihre derzeitige durchschnittliche Gesamtarbeitszeit pro Woche (inklusive evtl. anfallender Überstunden)?

|\_|\_|\_| Stunden

### 7. Wenn Sie an Ihre durchschnittliche wöchentliche Arbeitszeit am SPZ denken (inkl. anfallender Überstunden): Wie viele Stunden wenden Sie gegenwärtig für folgende leitungsbezogene Aufgaben auf?

Für die Weiterentwicklung Ihres Teams

|\_|\_| Stunden pro Woche

Für die Weiterentwicklung der Organisationsstruktur am SPZ

|\_|\_| Stunden pro Woche

Für administrative Aufgaben (z.B. Unterzeichnung von Verträgen)

|\_|\_| Stunden pro Woche

### 8. Haben Sie die ICF-CY in der Vergangenheit bereits angewendet?

☐

Nein

☐

Ich wende die ICF-CY gelegentlich an

☐

Ich habe von der ICF-CY schon einmal gehört

☐

Ich wende die ICF-CY regelmäßig an

☐

Ich habe die ICF-CY schon einmal angewendet

☐

Ich wende die ICF-CY immer an

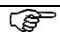

Bitte beschreiben Sie hier kurz Ihre bisherigen Erfahrungen mit der ICF-CY

### Zum Schluss geben Sie bitte Ihren Code an, den Sie gewählt haben

|  |  |  |  |  |  |  |  |
|--|--|--|--|--|--|--|--|
|  |  |  |  |  |  |  |  |
|--|--|--|--|--|--|--|--|

#### Zur Erinnerung:

In die ersten zwei Kästchen notieren Sie die **zwei letzten Buchstaben des ersten Vornamens Ihrer Mutter**.

In die nächsten zwei Kästchen notieren Sie die **zwei letzten Buchstaben des Nachnamens Ihrer Mutter**.

In die folgenden zwei Kästchen notieren Sie **den Geburtstag Ihrer Mutter**.

In die letzten zwei Kästchen notieren Sie **den Geburtsmonat Ihrer Mutter**.

**Beispiel:** Ihre Mutter heißt Petra Johanna Musterfrau. Ihre Mutter hat am **09.04.** Geburtstag.

Der Code lautet daher:

|   |   |   |   |   |   |   |   |
|---|---|---|---|---|---|---|---|
| R | A | A | U | 0 | 9 | 0 | 4 |
|---|---|---|---|---|---|---|---|

## Vielen Dank für Ihre Teilnahme!

Bitte geben Sie den ausgefüllten Fragebogen **in den beiliegenden Umschlag, verschließen Sie diesen** und schicken Sie ihn zusammen mit den Fragebögen Ihrer Mitarbeiter an das Projektteam. Ihre Daten werden nur von den Projektmitarbeitern weiterverarbeitet. Die Auswertung erfolgt aggregiert, sodass keine Rückschlüsse auf Ihre Person möglich sind.

[illegible]



## II. Umsetzung der Schulungsinhalte im SPZ-Alltag

### 1. Nach der PART-CHILD-Teamschulung: Wie häufig wenden Sie folgende Aspekte in Ihrer Arbeit mit Patienten und Eltern an?

 Bitte machen Sie in jeder Zeile ein Kreuz.

|                                                                                                                                                                                                                                                | wende ich<br>regelmäßig<br>an | wende ich<br>gelegentlich<br>an | habe ich<br>schon einmal<br>angewendet | habe ich<br>noch nie<br>angewendet |
|------------------------------------------------------------------------------------------------------------------------------------------------------------------------------------------------------------------------------------------------|-------------------------------|---------------------------------|----------------------------------------|------------------------------------|
| Ich richte mein diagnostisches und beratendes Tun an Alltagsthemen des Patienten aus.                                                                                                                                                          | <input type="checkbox"/>      | <input type="checkbox"/>        | <input type="checkbox"/>               | <input type="checkbox"/>           |
| Ich erfasse das, was der Patient im Alltag macht, indem ich den Teilhabestatus (LAKMoSHiBeG) oder Teile davon mit Eltern und wenn möglich auch mit dem Patienten erhebe.                                                                       | <input type="checkbox"/>      | <input type="checkbox"/>        | <input type="checkbox"/>               | <input type="checkbox"/>           |
| Ich erarbeite die Teilhabepräferenz des Patienten mit den Eltern und wenn möglich auch mit dem Patienten gemeinsam.                                                                                                                            | <input type="checkbox"/>      | <input type="checkbox"/>        | <input type="checkbox"/>               | <input type="checkbox"/>           |
| Ich ordne die wichtigsten Aspekte bei der Erstellung des Briefes alleine oder mit anderen Fachkräften den ICF-Komponenten zu (Erstellung des ICF-Profiles).                                                                                    | <input type="checkbox"/>      | <input type="checkbox"/>        | <input type="checkbox"/>               | <input type="checkbox"/>           |
| Ich vergebe für die wichtigsten Aspekte bei der Erstellung der Briefe ICF-Codes und/oder ICF-Schlüsselworte.                                                                                                                                   | <input type="checkbox"/>      | <input type="checkbox"/>        | <input type="checkbox"/>               | <input type="checkbox"/>           |
| Ich verwende die ICF-Web-App für die Erstellung der Briefe.                                                                                                                                                                                    | <input type="checkbox"/>      | <input type="checkbox"/>        | <input type="checkbox"/>               | <input type="checkbox"/>           |
| Ich ordne die wichtigsten Aspekte in einem gemeinsamen Gespräch (meistens nach Abschluss der Diagnostik im SPZ) mit Eltern, wenn möglich mit dem Patienten und ggf. weiteren Fachkräften den ICF-Komponenten zu (Erstellung des ICF-Profiles). | <input type="checkbox"/>      | <input type="checkbox"/>        | <input type="checkbox"/>               | <input type="checkbox"/>           |
| Ich erarbeite Teilhabeziele gemeinsam mit Eltern und wenn möglich auch mit dem Patienten, indem ich sie durch meine Gesprächsführung auf dem Weg vom Wunsch zum Ziel begleite.                                                                 | <input type="checkbox"/>      | <input type="checkbox"/>        | <input type="checkbox"/>               | <input type="checkbox"/>           |
| Ich richte mein therapeutisches Tun bzw. meine Therapieplanung an dem Teilhabeziel des Patienten (ggf. von Eltern oder anderen für den Patienten formuliert) aus.                                                                              | <input type="checkbox"/>      | <input type="checkbox"/>        | <input type="checkbox"/>               | <input type="checkbox"/>           |
| Ich erarbeite mit Eltern, wenn möglich mit dem Patienten und ggf. weiteren Fachkräften gemeinsam auf dem Boden der Teilhabeziele und ICF-Profile einen Handlungsplan.                                                                          | <input type="checkbox"/>      | <input type="checkbox"/>        | <input type="checkbox"/>               | <input type="checkbox"/>           |
| Ich beteilige Eltern an Entscheidungsprozessen.                                                                                                                                                                                                | <input type="checkbox"/>      | <input type="checkbox"/>        | <input type="checkbox"/>               | <input type="checkbox"/>           |
| Ich beteilige Patienten (ca. > 5 Jahre kognitives Niveau) an Entscheidungsprozessen.                                                                                                                                                           | <input type="checkbox"/>      | <input type="checkbox"/>        | <input type="checkbox"/>               | <input type="checkbox"/>           |



## 2. Verwenden Sie die ICF-CY Schlüsselwortliste in Ihrer alltäglichen Arbeit?

☐ nein

 Bitte machen Sie mit **Frage 5** weiter

☐ ja

 Bitte machen Sie mit **Frage 3** weiter

## 3. Seit welchem Zeitpunkt nach der Schulung arbeiten Sie mit der ICF-CY Schlüsselwortliste?

Ihr erster Schulungstermin im Rahmen von PART-CHILD war im: \_\_\_\_\_ (Monat) \_\_\_\_\_ (Jahr)

Ungefährer Zeitpunkt, seit dem Sie die ICF-CY Schlüsselwortliste verwenden: \_\_\_\_\_ (Monat) \_\_\_\_\_ (Jahr)

## 4. Bitte schätzen Sie: In wie vielen Patientenkontakten haben Sie die ICF-CY Schlüsselwortliste seither schon genutzt?

Ungefährer Anteil der Patientenkontakte in %: \_\_\_\_\_

## 5. Welche Auswirkungen hat das Arbeiten nach ICF oder der Einsatz der entsprechenden ICF-basierten Assessment-Hilfen bereits jetzt auf:

 Bitte machen Sie in jeder Zeile ein Kreuz.

|                                                   | sehr negativ             | eher negativ             | keine Auswirkung         | eher positiv             | sehr positiv             |
|---------------------------------------------------|--------------------------|--------------------------|--------------------------|--------------------------|--------------------------|
| die Diagnostik                                    | <input type="checkbox"/> |
| die Therapieplanung                               | <input type="checkbox"/> |
| die Patientenorientierung                         | <input type="checkbox"/> |
| die interdisziplinäre Kommunikation               | <input type="checkbox"/> |
| die interdisziplinäre Zusammenarbeit              | <input type="checkbox"/> |
| die einrichtungsübergreifende Zusammenarbeit      | <input type="checkbox"/> |
| die Gesprächsführung mit den Eltern und Patienten | <input type="checkbox"/> |
| den Therapieprozess insgesamt                     | <input type="checkbox"/> |

## 6. Wenn die ersten Hürden beim Arbeiten nach ICF erst einmal überwunden sind: Welches Potenzial kann das Arbeiten nach ICF Ihrer Einschätzung nach in Zukunft haben für:

 Bitte machen Sie in jeder Zeile ein Kreuz.

|                                                   | sehr geringes            | eher geringes            | kein Potenzial           | eher großes              | sehr großes              |
|---------------------------------------------------|--------------------------|--------------------------|--------------------------|--------------------------|--------------------------|
| die Diagnostik                                    | <input type="checkbox"/> |
| die Therapieplanung                               | <input type="checkbox"/> |
| die Patientenorientierung                         | <input type="checkbox"/> |
| die interdisziplinäre Kommunikation               | <input type="checkbox"/> |
| die interdisziplinäre Zusammenarbeit              | <input type="checkbox"/> |
| die einrichtungsübergreifende Zusammenarbeit      | <input type="checkbox"/> |
| die Gesprächsführung mit den Eltern und Patienten | <input type="checkbox"/> |

|                               | sehr geringes            | eher geringes            | kein Potenzial           | eher großes              | sehr großes              |
|-------------------------------|--------------------------|--------------------------|--------------------------|--------------------------|--------------------------|
| den Therapieprozess insgesamt | <input type="checkbox"/> |

### 7. Wie beurteilen Sie den derzeitigen praktischen und zeitlichen Aufwand der Arbeit nach ICF für das SPZ-Team?

| kein Aufwand             | geringer Aufwand         | mäßiger Aufwand          | großer Aufwand           | sehr großer Aufwand      |
|--------------------------|--------------------------|--------------------------|--------------------------|--------------------------|
| <input type="checkbox"/> |

### 8. Inwieweit stimmen Sie der folgenden Aussage zu:

|                                                                                                                                                                    | stimme überhaupt nicht zu | stimme eher nicht zu     | weder- noch              | stimme eher zu           | stimme voll und ganz zu  |
|--------------------------------------------------------------------------------------------------------------------------------------------------------------------|---------------------------|--------------------------|--------------------------|--------------------------|--------------------------|
| Wenn das Arbeiten nach ICF in Ihrem SPZ zur Routine geworden ist, steht der zu diesem Zeitpunkt zu erwartende Nutzen in einem angemessenen Verhältnis zum Aufwand. | <input type="checkbox"/>  | <input type="checkbox"/> | <input type="checkbox"/> | <input type="checkbox"/> | <input type="checkbox"/> |

### 9. Welche Barrieren erschweren Ihnen persönlich das Arbeiten nach ICF in Ihrem beruflichen Alltag?

 Bitte machen Sie in jeder Zeile ein Kreuz.

|                                                                                                              | keine Barriere           | geringe Barriere         | mäßige Barriere          | starke Barriere          | sehr starke Barriere     |
|--------------------------------------------------------------------------------------------------------------|--------------------------|--------------------------|--------------------------|--------------------------|--------------------------|
| Barrieren der SPZ-Struktur (z.B. keine Zeit, nicht passende Abläufe innerhalb des SPZ, Teamgröße)            | <input type="checkbox"/> |
| Sonstige strukturelle Barrieren, und zwar:<br>_____                                                          | <input type="checkbox"/> |
| Barrieren der Versorgungsstruktur (z.B. Finanzierung über Pauschale, Vorgaben vom SPZ-Träger)                | <input type="checkbox"/> |
| Inhaltliche Faktoren (z.B. Konzepte der ICF-CY, Vereinbarkeit mit schon bestehenden Klassifikationen im SPZ) | <input type="checkbox"/> |
| Sonstiges, und zwar:<br>_____                                                                                | <input type="checkbox"/> |

### 10. Haben Sie nach der PART-CHILD-Teamschulung an weiteren externen Fortbildungen zu einzelnen vorgestellten Schulungsinhalten teilgenommen? Wenn ja, zu welchen Themen? (z.B. ICF-CY, Motivational Interviewing)

- ☐ Ja, und zwar: \_\_\_\_\_
- ☐ Nein

### 11. Wie groß sind Ihrer Einschätzung nach die Auswirkungen der Corona-Pandemie auf die Umsetzung der Schulungsinhalte in Ihrem Arbeitsalltag?

| sehr gering              | eher gering              | mittel                   | eher groß                | sehr groß                |
|--------------------------|--------------------------|--------------------------|--------------------------|--------------------------|
| <input type="checkbox"/> |

### III. Allgemeine Angaben zur Patientenversorgung an Ihrem SPZ

#### 1. Wie viele Patientenkontakte haben Sie derzeit durchschnittlich pro Woche?

Präsenztermine: |\_|\_|\_|\_|, davon dauern: |\_|\_|\_|\_| über 2 Stunden  
 |\_|\_|\_|\_| 1 bis 2 Stunden  
 |\_|\_|\_|\_| unter 1 Stunde

Telefonische/ E-Mail-Kontakte: |\_|\_|\_|\_|

#### 2. Wie hoch ist Ihre derzeitige durchschnittliche Gesamtarbeitszeit pro Woche (inklusive evtl. anfallender Überstunden)? |\_|\_|\_| Stunden

#### 3. Wenn Sie an Ihre durchschnittliche wöchentliche Arbeitszeit im SPZ denken (inklusive evtl. anfallender Überstunden): Wie viele Stunden wenden Sie gegenwärtig für folgende Tätigkeiten auf:

|                                                                                                 |               |
|-------------------------------------------------------------------------------------------------|---------------|
| Die konkrete Arbeit mit Patienten und Eltern?                                                   | _____ Stunden |
| Die Therapieplanung (inkl. Vorbereitung und Terminvereinbarung)?                                | _____ Stunden |
| Die Dokumentation (z.B. Diagnosen, Befunde, Arztberichte, Bescheinigungen)?                     | _____ Stunden |
| Die fallbezogene interdisziplinäre Zusammenarbeit im SPZ (z.B. Fallkonferenzen, runde Tische)?  | _____ Stunden |
| Die einrichtungsübergreifende Zusammenarbeit (z.B. mit Jugend-/ Sozialamt)?                     | _____ Stunden |
| Die Weiterentwicklung der Versorgung am SPZ (z.B. Arbeitsgruppe zur Umsetzung neuer Standards)? | _____ Stunden |
| sonstige Tätigkeiten, z.B.:                                                                     | _____ Stunden |
|                                                                                                 | _____ Stunden |
|                                                                                                 | _____ Stunden |

#### 4. Wie effizient schätzen Sie derzeit ...

 Bitte machen Sie in jeder Zeile ein Kreuz auf der Skala.

|                                                                                                                                                                                | Überhaupt nicht effizient |                          |                          |                          |                          |                          |                          |                          |                          |                          | Sehr effizient | Kann nicht beurteilen    |
|--------------------------------------------------------------------------------------------------------------------------------------------------------------------------------|---------------------------|--------------------------|--------------------------|--------------------------|--------------------------|--------------------------|--------------------------|--------------------------|--------------------------|--------------------------|----------------|--------------------------|
|                                                                                                                                                                                | 0                         | 1                        | 2                        | 3                        | 4                        | 5                        | 6                        | 7                        | 8                        | 9                        |                |                          |
| ... die konkrete Arbeit mit Patienten und Eltern in Ihrem SPZ ein?                                                                                                             | <input type="checkbox"/>  | <input type="checkbox"/> | <input type="checkbox"/> | <input type="checkbox"/> | <input type="checkbox"/> | <input type="checkbox"/> | <input type="checkbox"/> | <input type="checkbox"/> | <input type="checkbox"/> | <input type="checkbox"/> |                | <input type="checkbox"/> |
| ... die Therapieplanung (inkl. Vorbereitung und Terminvereinbarung) ein?                                                                                                       | <input type="checkbox"/>  | <input type="checkbox"/> | <input type="checkbox"/> | <input type="checkbox"/> | <input type="checkbox"/> | <input type="checkbox"/> | <input type="checkbox"/> | <input type="checkbox"/> | <input type="checkbox"/> | <input type="checkbox"/> |                | <input type="checkbox"/> |
| ... die Dokumentation in Ihrem SPZ ein?                                                                                                                                        | <input type="checkbox"/>  | <input type="checkbox"/> | <input type="checkbox"/> | <input type="checkbox"/> | <input type="checkbox"/> | <input type="checkbox"/> | <input type="checkbox"/> | <input type="checkbox"/> | <input type="checkbox"/> | <input type="checkbox"/> |                | <input type="checkbox"/> |
| ... die <b>fallbezogene</b> interdisziplinäre Zusammenarbeit in Ihrem SPZ ein?                                                                                                 | <input type="checkbox"/>  | <input type="checkbox"/> | <input type="checkbox"/> | <input type="checkbox"/> | <input type="checkbox"/> | <input type="checkbox"/> | <input type="checkbox"/> | <input type="checkbox"/> | <input type="checkbox"/> | <input type="checkbox"/> |                | <input type="checkbox"/> |
| ... die <b>fallunabhängige</b> interdisziplinäre Zusammenarbeit in Ihrem SPZ (z.B. Erweiterung von Therapiestandards, Standards in der Betrachtung von Krankheitsbildern) ein? | <input type="checkbox"/>  | <input type="checkbox"/> | <input type="checkbox"/> | <input type="checkbox"/> | <input type="checkbox"/> | <input type="checkbox"/> | <input type="checkbox"/> | <input type="checkbox"/> | <input type="checkbox"/> | <input type="checkbox"/> |                | <input type="checkbox"/> |
| ... die <b>einrichtungsübergreifende</b> Zusammenarbeit (z.B. Kinderärzte, Jugend-/Sozialamt, Frühförderstellen) ein?                                                          | <input type="checkbox"/>  | <input type="checkbox"/> | <input type="checkbox"/> | <input type="checkbox"/> | <input type="checkbox"/> | <input type="checkbox"/> | <input type="checkbox"/> | <input type="checkbox"/> | <input type="checkbox"/> | <input type="checkbox"/> |                | <input type="checkbox"/> |

#### 5. Bitte denken Sie an das letzte Quartal: Wie hoch war der Anteil Ihrer Patienten und Eltern, die sich ziemlich genau an getroffene Vereinbarungen gehalten haben bezüglich der...

 Bitte machen Sie in jeder Zeile ein Kreuz auf der Skala.

*Wenn ein Punkt für Ihre Berufsgruppe nicht beurteilbar ist, kreuzen Sie „Kann nicht beurteilen“ an.*

|                                                                                                                | 0% | 10% | 20% | 30% | 40% | 50% | 60% | 70% | 80% | 90% | 100% | Kann nicht beurteilen    |
|----------------------------------------------------------------------------------------------------------------|----|-----|-----|-----|-----|-----|-----|-----|-----|-----|------|--------------------------|
| Einnahme verordneter Medikamente?                                                                              |    |     |     |     |     |     |     |     |     |     |      | <input type="checkbox"/> |
| Inanspruchnahme von sonstigen nicht-ärztlichen Leistungen?                                                     |    |     |     |     |     |     |     |     |     |     |      |                          |
| Ergotherapie                                                                                                   |    |     |     |     |     |     |     |     |     |     |      | <input type="checkbox"/> |
| Logopädie                                                                                                      |    |     |     |     |     |     |     |     |     |     |      | <input type="checkbox"/> |
| Physiotherapie                                                                                                 |    |     |     |     |     |     |     |     |     |     |      | <input type="checkbox"/> |
| Sonstige Therapien:                                                                                            |    |     |     |     |     |     |     |     |     |     |      | <input type="checkbox"/> |
| <hr/>                                                                                                          |    |     |     |     |     |     |     |     |     |     |      |                          |
| Ausstattung mit Hilfsmitteln (z.B. Gehhilfen, Schreibhilfen, Rollstuhl)?                                       |    |     |     |     |     |     |     |     |     |     |      | <input type="checkbox"/> |
| Inanspruchnahme von Schulungen bzw. Beratungen (z.B. Elterntraining, Beratung zur Erziehung, sozialen Hilfen)? | 0% | 10% | 20% | 30% | 40% | 50% | 60% | 70% | 80% | 90% | 100% | <input type="checkbox"/> |

#### IV. Allgemeine Zufriedenheit mit der beruflichen Tätigkeit

 Bitte machen Sie in jeder Zeile ein Kreuz.

[illegible]

**Zum Schluss geben Sie bitte Ihren Code an, den Sie gewählt haben**

|  |  |  |  |  |  |  |  |
|--|--|--|--|--|--|--|--|
|  |  |  |  |  |  |  |  |
|--|--|--|--|--|--|--|--|

**Zur Erinnerung:**

In die ersten zwei Kästchen notieren Sie die **zwei letzten Buchstaben des ersten Vornamens Ihrer Mutter**.

In die nächsten zwei Kästchen notieren Sie die **zwei letzten Buchstaben des Nachnamens Ihrer Mutter**.

In die folgenden zwei Kästchen notieren Sie **den Geburtstag Ihrer Mutter**.

In die letzten zwei Kästchen notieren Sie **den Geburtsmonat Ihrer Mutter**.

**Beispiel:** Ihre Mutter heißt Petra Johanna Musterau. Ihre Mutter hat am **09.04.** Geburtstag.

Der Code lautet daher: 

|   |   |   |   |   |   |   |   |
|---|---|---|---|---|---|---|---|
| R | A | A | U | 0 | 9 | 0 | 4 |
|---|---|---|---|---|---|---|---|

**Vielen Dank für Ihre Teilnahme!**

Bitte geben Sie den ausgefüllten Fragebogen **in den beiliegenden Umschlag, verschließen Sie diesen und legen Sie ihn in die dafür vorgesehene Kiste in Ihrem SPZ-Sekretariat**. Die Fragebögen werden dann gesammelt an das Projektteam weitergeleitet. Ihre Daten werden nur von den Projektmitarbeitern weiterverarbeitet. Die Auswertung erfolgt aggregiert, sodass keine Rückschlüsse auf Ihre Person möglich sind.

[illegible]

## 2. Bitte geben Sie an, **wie gut Sie in der Regel folgende Aspekte** in Ihrer Arbeit mit Patienten bzw. Eltern **umsetzen können**.

 Bitte machen Sie in jeder Zeile ein Kreuz. Wenn Sie als Fachkraft nur mit Kleinkindern bzw. mit schwerbehinderten Patienten arbeiten, kreuzen Sie bitte „nicht zutreffend“ an.

| Patienten                                                                                   | Überhaupt nicht gut      |                          |                          |                          |                          |                          |                          |                          |                          |                          | Sehr gut                 | Nicht zutreffend         |
|---------------------------------------------------------------------------------------------|--------------------------|--------------------------|--------------------------|--------------------------|--------------------------|--------------------------|--------------------------|--------------------------|--------------------------|--------------------------|--------------------------|--------------------------|
|                                                                                             | 0                        | 1                        | 2                        | 3                        | 4                        | 5                        | 6                        | 7                        | 8                        | 9                        |                          |                          |
| ... bekommen stets klare Informationen.                                                     | <input type="checkbox"/> |
| ... bekommen immer Gelegenheit Fragen zu stellen.                                           | <input type="checkbox"/> |
| ... äußern ihre Meinungen.                                                                  | <input type="checkbox"/> |
| ... werden stets in die Besprechung von Versorgungs- bzw. Therapieoptionen einbezogen.      | <input type="checkbox"/> |
| ... werden gleichberechtigt an Entscheidungen über ihre Versorgung bzw. Therapie beteiligt. | <input type="checkbox"/> |
| ... übernehmen die Verantwortung für ihre Gesundheit.                                       | <input type="checkbox"/> |

| Eltern                                                                                                  | Überhaupt nicht gut      |                          |                          |                          |                          |                          |                          |                          |                          |                          | Sehr gut                 |
|---------------------------------------------------------------------------------------------------------|--------------------------|--------------------------|--------------------------|--------------------------|--------------------------|--------------------------|--------------------------|--------------------------|--------------------------|--------------------------|--------------------------|
|                                                                                                         | 0                        | 1                        | 2                        | 3                        | 4                        | 5                        | 6                        | 7                        | 8                        | 9                        |                          |
| ... bekommen stets klare Informationen.                                                                 | <input type="checkbox"/> |
| ... bekommen immer Gelegenheit Fragen zu stellen.                                                       | <input type="checkbox"/> |
| ... äußern ihre Meinungen.                                                                              | <input type="checkbox"/> |
| ... werden stets in die Besprechung von Versorgungs- bzw. Therapieoptionen einbezogen.                  | <input type="checkbox"/> |
| ... werden gleichberechtigt an Entscheidungen über die Versorgung bzw. Therapie ihrer Kinder beteiligt. | <input type="checkbox"/> |
| ... übernehmen die Verantwortung für die Gesundheit ihrer Kinder.                                       | <input type="checkbox"/> |

## II. Umsetzung der Schulungsinhalte im SPZ-Alltag

### 1. Welche Aktivitäten wurden in Ihrem SPZ nach der PART-CHILD-Teamschulung ins Leben gerufen, um die Umsetzung einzelner Schulungsinhalte in der täglichen Arbeit zu unterstützen?

### 2. Wurden nach der PART-CHILD-Teamschulung Schulungsinhalte in SPZ-internen Fortbildungen außerhalb der Implementierungsbegleitung vertieft?

Wenn ja, zu welchen Themen fanden SPZ-interne Fortbildungen statt? (z.B. ICF-CY, Motivational Interviewing)

- ☐ Ja, und zwar: \_\_\_\_\_
- ☐ Nein

### 3. Nach der PART-CHILD-Teamschulung: Wie häufig wenden Sie folgende Aspekte in Ihrer Arbeit mit Patienten und Eltern an?

 Bitte machen Sie in jeder Zeile ein Kreuz.

|                                                                                                                                                                                                                                                | wende ich<br>regelmäßig<br>an | wende ich<br>gelegentlich<br>an | habe ich<br>schon einmal<br>angewendet | habe ich<br>noch nie<br>angewendet |
|------------------------------------------------------------------------------------------------------------------------------------------------------------------------------------------------------------------------------------------------|-------------------------------|---------------------------------|----------------------------------------|------------------------------------|
| Ich richte mein diagnostisches und beratendes Tun an Alltagsthemen des Patienten aus.                                                                                                                                                          | <input type="checkbox"/>      | <input type="checkbox"/>        | <input type="checkbox"/>               | <input type="checkbox"/>           |
| Ich erfasse das, was der Patient im Alltag macht, indem ich den Teilhabestatus (LAKMoSHIBeG) oder Teile davon mit Eltern und wenn möglich auch mit dem Patienten erhebe.                                                                       | <input type="checkbox"/>      | <input type="checkbox"/>        | <input type="checkbox"/>               | <input type="checkbox"/>           |
| Ich erarbeite die Teilhabepräferenz des Patienten mit den Eltern und wenn möglich auch mit dem Patienten gemeinsam.                                                                                                                            | <input type="checkbox"/>      | <input type="checkbox"/>        | <input type="checkbox"/>               | <input type="checkbox"/>           |
| Ich ordne die wichtigsten Aspekte bei der Erstellung des Briefes alleine oder mit anderen Fachkräften den ICF-Komponenten zu (Erstellung des ICF-Profiles).                                                                                    | <input type="checkbox"/>      | <input type="checkbox"/>        | <input type="checkbox"/>               | <input type="checkbox"/>           |
| Ich vergebe für die wichtigsten Aspekte bei der Erstellung der Briefe ICF-Codes und/oder ICF-Schlüsselworte.                                                                                                                                   | <input type="checkbox"/>      | <input type="checkbox"/>        | <input type="checkbox"/>               | <input type="checkbox"/>           |
| Ich verwende die ICF-Web-App für die Erstellung der Briefe.                                                                                                                                                                                    | <input type="checkbox"/>      | <input type="checkbox"/>        | <input type="checkbox"/>               | <input type="checkbox"/>           |
| Ich ordne die wichtigsten Aspekte in einem gemeinsamen Gespräch (meistens nach Abschluss der Diagnostik im SPZ) mit Eltern, wenn möglich mit dem Patienten und ggf. weiteren Fachkräften den ICF-Komponenten zu (Erstellung des ICF-Profiles). | <input type="checkbox"/>      | <input type="checkbox"/>        | <input type="checkbox"/>               | <input type="checkbox"/>           |
| Ich erarbeite Teilhabeziele gemeinsam mit Eltern und wenn möglich auch mit dem Patienten, indem ich sie durch meine Gesprächsführung auf dem Weg vom Wunsch zum Ziel begleite.                                                                 | <input type="checkbox"/>      | <input type="checkbox"/>        | <input type="checkbox"/>               | <input type="checkbox"/>           |
| Ich richte mein therapeutisches Tun bzw. meine Therapieplanung an dem Teilhabeziel des Patienten (ggf. von Eltern oder anderen für den Patienten formuliert) aus.                                                                              | <input type="checkbox"/>      | <input type="checkbox"/>        | <input type="checkbox"/>               | <input type="checkbox"/>           |
| Ich erarbeite mit Eltern, wenn möglich mit dem Patienten und ggf. weiteren Fachkräften gemeinsam auf dem Boden der Teilhabeziele und ICF-Profile einen Handlungsplan.                                                                          | <input type="checkbox"/>      | <input type="checkbox"/>        | <input type="checkbox"/>               | <input type="checkbox"/>           |
| Ich beteilige Eltern an Entscheidungsprozessen.                                                                                                                                                                                                | <input type="checkbox"/>      | <input type="checkbox"/>        | <input type="checkbox"/>               | <input type="checkbox"/>           |
| Ich beteilige Patienten (ca. > 5 Jahre kognitives Niveau) an Entscheidungsprozessen.                                                                                                                                                           | <input type="checkbox"/>      | <input type="checkbox"/>        | <input type="checkbox"/>               | <input type="checkbox"/>           |



#### 4. Verwenden Sie die ICF-CY Schlüsselwortliste in Ihrer alltäglichen Arbeit?

- ☐ nein  Bitte machen Sie mit **Frage 7** weiter
- ☐ ja  Bitte machen Sie mit **Frage 5** weiter

#### 5. Seit welchem Zeitpunkt nach der Schulung arbeiten Sie mit der ICF-CY Schlüsselwortliste?

Ihr erster Schulungstermin im Rahmen von PART-CHILD war im: \_\_\_\_\_ (Monat) \_\_\_\_\_ (Jahr)

Ungefährer Zeitpunkt, seit dem Sie die ICF-CY Schlüsselwortliste verwenden: \_\_\_\_\_ (Monat) \_\_\_\_\_ (Jahr)

#### 6. Bitte schätzen Sie: In wie vielen Patientenkontakten haben Sie die ICF-CY Schlüsselwortliste seither schon genutzt?

Ungefährer Anteil der Patientenkontakte in %: \_\_\_\_\_

#### 7. Welche Auswirkungen hat das Arbeiten nach ICF oder der Einsatz der entsprechenden ICF-basierten Assessment-Hilfen bereits jetzt auf:

 Bitte machen Sie in jeder Zeile ein Kreuz.

|                                                   | sehr negativ             | eher negativ             | keine Auswirkung         | eher positiv             | sehr positiv             |
|---------------------------------------------------|--------------------------|--------------------------|--------------------------|--------------------------|--------------------------|
| die Diagnostik                                    | <input type="checkbox"/> |
| die Therapieplanung                               | <input type="checkbox"/> |
| die Patientenorientierung                         | <input type="checkbox"/> |
| die interdisziplinäre Kommunikation               | <input type="checkbox"/> |
| die interdisziplinäre Zusammenarbeit              | <input type="checkbox"/> |
| die einrichtungsübergreifende Zusammenarbeit      | <input type="checkbox"/> |
| die Gesprächsführung mit den Eltern und Patienten | <input type="checkbox"/> |
| den Therapieprozess insgesamt                     | <input type="checkbox"/> |

#### 8. Wenn die ersten Hürden beim Arbeiten nach ICF erst einmal überwunden sind: Welches Potenzial kann das Arbeiten nach ICF Ihrer Einschätzung nach in Zukunft haben für:

 Bitte machen Sie in jeder Zeile ein Kreuz.

|                                                   | sehr geringes            | eher geringes            | kein Potenzial           | eher großes              | sehr großes              |
|---------------------------------------------------|--------------------------|--------------------------|--------------------------|--------------------------|--------------------------|
| die Diagnostik                                    | <input type="checkbox"/> |
| die Therapieplanung                               | <input type="checkbox"/> |
| die Patientenorientierung                         | <input type="checkbox"/> |
| die interdisziplinäre Kommunikation               | <input type="checkbox"/> |
| die interdisziplinäre Zusammenarbeit              | <input type="checkbox"/> |
| die einrichtungsübergreifende Zusammenarbeit      | <input type="checkbox"/> |
| die Gesprächsführung mit den Eltern und Patienten | <input type="checkbox"/> |



|                                                                                                                        | stimme<br>überhaupt<br>nicht zu |                          |                          |                          |                          |                          |                          |                          |                          |                          | stimme<br>voll und<br>ganz zu |  |
|------------------------------------------------------------------------------------------------------------------------|---------------------------------|--------------------------|--------------------------|--------------------------|--------------------------|--------------------------|--------------------------|--------------------------|--------------------------|--------------------------|-------------------------------|--|
|                                                                                                                        | 0                               | 1                        | 2                        | 3                        | 4                        | 5                        | 6                        | 7                        | 8                        | 9                        |                               |  |
| Die Fachkräfte bilden interdisziplinäre Arbeitsgruppen zur bestmöglichen Erreichung der Teilhabeziele ihrer Patienten. | <input type="checkbox"/>        | <input type="checkbox"/> | <input type="checkbox"/> | <input type="checkbox"/> | <input type="checkbox"/> | <input type="checkbox"/> | <input type="checkbox"/> | <input type="checkbox"/> | <input type="checkbox"/> | <input type="checkbox"/> |                               |  |
| Das Arbeiten nach ICF wird als Qualitätskriterium der Versorgung nach außen kommuniziert.                              | <input type="checkbox"/>        | <input type="checkbox"/> | <input type="checkbox"/> | <input type="checkbox"/> | <input type="checkbox"/> | <input type="checkbox"/> | <input type="checkbox"/> | <input type="checkbox"/> | <input type="checkbox"/> | <input type="checkbox"/> |                               |  |

### 13. Wie groß sind Ihrer Einschätzung nach die Auswirkungen der Corona-Pandemie auf die Umsetzung der Schulungsinhalte in Ihrem Arbeitsalltag?

| sehr gering              | eher gering              | mittel                   | eher groß                | sehr groß                |
|--------------------------|--------------------------|--------------------------|--------------------------|--------------------------|
| <input type="checkbox"/> |

### 14. Inwiefern wirkt sich die Corona-Pandemie in Ihrem SPZ auf die Umsetzung der Schulungsinhalte aus?

 Stichpunkte reichen aus.

### 15. Inwiefern wirkt sich die Corona-Pandemie in Ihrem SPZ auf die Patientenversorgung allgemein aus?

 Stichpunkte reichen aus.

## III. Angaben zu den Kosten der PART-CHILD-Intervention

Folgende Angaben sind wichtig für die ökonomische Evaluation der PART-CHILD-Intervention.

 Bitte geben Sie im Folgenden die geschätzten Gesamtkosten oder die geschätzte Summe der Stundenlöhne oder die geschätzte Anzahl der Arbeitsstunden aller jeweils beteiligten Mitarbeiter an.

### 1. Auf welche Höhe beliefen sich die geschätzten Kosten, die im Rahmen der Teamschulungen entstanden sind?

|                                                                                |                                             |
|--------------------------------------------------------------------------------|---------------------------------------------|
| ... für die Schulungsräumlichkeiten?                                           | _____ €                                     |
| ... für den technischen Support vor Ort?                                       | _____ € <u>oder</u><br>_____ Arbeitsstunden |
| ... für weitere Ausgaben, die im Rahmen der Schulung anfielen (z.B. Catering)? | _____ €                                     |
| ... Sonstiges, und zwar: _____                                                 | _____ € <u>oder</u><br>_____ Arbeitsstunden |

[illegible]

[illegible]

## VII. Angaben zu Ihrer Person

**1. Wie hoch ist Ihre derzeitige durchschnittliche Gesamtarbeitszeit pro Woche |\_\_|\_\_|\_\_| Stunden (inklusive evtl. anfallender Überstunden)?**

**2. Wenn Sie an Ihre durchschnittliche wöchentliche Arbeitszeit am SPZ denken (inkl. anfallender Überstunden): Wie viele Stunden wenden Sie gegenwärtig für folgende leitungsbezogene Aufgaben auf?**

Für die Weiterentwicklung Ihres Teams |\_\_|\_\_| Stunden pro Woche

Für die Weiterentwicklung der Organisationsstruktur am SPZ |\_\_|\_\_| Stunden pro Woche

Für administrative Aufgaben (z.B. Abwicklung von Stellenbesetzung) |\_\_|\_\_| Stunden pro Woche

**Online Supplementary File S3: Guides for semi-structured interviews with SPC directors and their staff**

## Leitfaden für die telefonischen Interviews mit Fachkräften

Interviewer: \_\_\_\_\_  
ID: \_\_\_\_\_  
SPZ\_ID: \_\_\_\_\_  
Datum: \_\_\_\_\_  
Dauer: \_\_\_\_\_

### 1. Einleitung

- Vorstellung der Interviewerin
- Erklärung zum Ablauf des Interviews, Erklärung zu spontanen Äußerungen und freier Assoziation
- Vorstellung des Interviewten (Alter, Berufsgruppe, Dauer der Beschäftigung im SPZ); Klärung der Teilnahme an der Mitarbeiterschulung.

Im Folgenden geht es um Ihre Erfahrungen im Rahmen der PART-CHILD-Intervention. Mit Intervention meinen wir sowohl die Mitarbeiterschulung (Haben Sie an dieser teilgenommen?), das ICF-Add-in/die ICF-Web-App und die Begleitung im SPZ-Alltag (Modul IMPLEMENT). Mit der Intervention meinen wir aber nicht die Datenerhebung, also nicht die Fragebögen, die Sie austeilten und auch selbst ausfüllen mussten.

### 2. Eingangsfragen (Warm up)

- Ganz allgemein betrachtet: Wie ist es Ihnen denn in der Zeit, in der PART-CHILD läuft, ergangen?

### 3. Hauptfragen

#### Veränderungen in der Haltung und in der subjektiven Praxis

- Was hat sich seit der PART-CHILD-Intervention in Ihrem Arbeitsalltag verändert?
  - Allgemein positiv wie negativ: Z.B. Abläufe, Arbeitsweise, mehr Zeit für den Patienten, Dokumentationsaufwand
  - Hat sich bei der Aufteilung Ihrer wöchentlichen Arbeitszeit etwas verändert? Wenn ja, bitte quantifizieren lassen.
  - Wenn mehreres: Was war für Sie persönlich die wichtigste Veränderung?
  - Warum hat sich das verändert?
  - Gelingen: Was war wichtig, damit diese Veränderung gelingen konnte?
  - Barrieren: Was waren Barrieren für diese Veränderung?
- Welche Veränderungen beobachten Sie bei Ihrer eigenen Einstellung zu Ihrer Tätigkeit?
  - Vertiefen: Inwiefern ist diese Veränderung bedeutsam?
  - Gelingen: Welche Faktoren haben diese Veränderung unterstützt?
  - Barrieren: Was waren Barrieren für diese Veränderung?
- Was hat sich durch die PART-CHILD-Intervention im Team Ihres SPZ verändert?
  - Welche Fachgruppen tun sich mit dieser Veränderung besonders leicht?
    - Warum denken Sie ist das so?
  - Welche Berufsgruppen tun sich besonders schwer mit der Veränderung?
    - Warum, denken Sie ist das so?



- Wie könnte man diese Berufsgruppen in diesem Veränderungsprozess unterstützen?
    - Zusammenarbeit zwischen verschiedenen Disziplinen?
    - Kommunikation mit anderen Abteilungen der Klinik?
- Wenn Sie an die Kommunikation in Ihrem SPZ denken: Welche Rolle spielt ICF-CY dabei?
  - Z.B. sind ICF-Themen Gegenstand von Routinebesprechungen?
- Welche Veränderungen beobachten Sie hinsichtlich der Zusammenarbeit mit externen Einrichtungen?  
 (Beispiele nur bei Unklarheit nennen: Einrichtungen, mit welchen Sie am häufigsten zusammenarbeiten z.B. Kindergarten / Schule/ Frühförderung/ Jugendhilfe/ Gesundheitsamt)
  - Veränderung in der Kommunikation?
  - Vertiefen: Inwiefern ist diese Veränderung bedeutsam?
  - Gelingen: Welche Faktoren haben diese Veränderung unterstützt?
  - Barrieren: Was sind Barrieren für diese Veränderung?
- Welche Elemente aus der PART-CHILD-Intervention setzen Sie in Ihrem Arbeitsalltag ein?
  - ICF-CY (z.B. Erfassung teilhaberelevanter Domänen nach Lakmashibek, Codieren)?
    - Teilhabeorientierung & Patientenzentrierung: Therapieziele (Teilhabestatus/Teilhabepräferenz / Aktionsplan/Handlungsplan) werden zusammen mit Patienten nach bestimmten Kriterien festgelegt, Gespräche nach bestimmten Schemata geführt)
  - MI-Werkzeugkoffer? Formulierung der Ziele auf Patientenebene?
  - Wie regelmäßig wenden Sie diese Elemente an? Bei allen Patienten?
  - Wie zufrieden sind sie damit? Warum?
  - Veränderungen der diagnostischen/ therapeutischen Praxis?
- Wie nutzen Sie derzeit ICF-CY?
  - Warum ist es für Sie persönlich wichtig, ICF-CY anzuwenden?
  - Gelingen: Welche Faktoren sind bei der Einführung der ICF-CY förderlich?
  - Barrieren: Welche Barrieren gibt es bei der Nutzung der ICF-CY?
  - Wie wenden Ihre KollegInnen die ICF-CY an? Unterschiede zwischen Disziplinen?

#### Einschätzung der Patienten-/Eltern-Einstellung

- Was schätzen Sie: Wie haben Ihre Patienten und Ihre Eltern von der Intervention in Ihrem SPZ profitiert?
  - Veränderung im Umgang mit Patienten/ Eltern, Kommunikation?
  - Veränderungen bezügl. der Adhärenz der Patienten?
  - Was waren die Gründe für diese Veränderungen?
  - Wie kommen die Veränderungen bei Ihren Patienten/ Eltern an (Mitmachen oder lieber den Therapeuten entscheiden lassen)?

#### Nutzung von Add-In/Web-App

- In Ihrem SPZ wurde Ihnen die Web-App zum praktischen Arbeiten nach ICF-CY zur Verfügung gestellt. Wurde sie denn in der Mitarbeiterschulung vorgestellt? Nutzen Sie die Web-App?  
Wenn ja:
  - Beschreiben Sie bitte, wie Sie die Web-App bisher typischerweise nutzen.

- *Täglich? Wie häufig im Schnitt am Tag?*
- *Bei welchen Anlässen? Bei welchen Terminarten eher?*
- *Wenn nicht bei allen Terminen: Was sind denn die Gründe dafür, dass Sie die Web-App nicht bei allen Gesprächen nutzen?*
- *Zeitpunkt der Nutzung: Vor, während oder nach den Patientengesprächen?*
- *Zu welchem Zweck nutzen Sie die Web-App (z.B. Dokumentation, interaktive Festlegung von Zielen mit Patienten und Eltern)?*
- Wissen Sie, wie Ihre Kollegen das Add-In in ihrer Arbeit einsetzen?
- Wie zufrieden sind Sie bisher mit der Web-App?
- Haben Sie Anregungen für die Weiterentwicklung der Web-App, damit es Ihre Arbeit noch besser unterstützt?

#### Wenn nein:

- Barrieren (internal): Was sind die Gründe, dass Sie die Web-App nicht nutzen?
- Barrieren (external): Welche Schwierigkeiten sehen Sie mit der Nutzung der Web-App im Arbeitsalltag verbunden?
  - *Zeitmangel, Nutzungsfreundlichkeit...?*
- Haben Sie Anregungen für die Weiterentwicklung der Web-App, damit sie Ihre Arbeit optimal unterstützen kann?
- Wissen Sie, ob Ihre Kollegen die Web-App in ihrer Arbeit einsetzen?

#### Standardisierung der Versorgung

- Eines der Projektziele war es, die Versorgungsqualität an SPZ zu verbessern. Inwiefern wurde dies an Ihrem SPZ erreicht? Woran machen Sie das fest?
  - Vertiefen: Warum ist dies für die Versorgungsqualität wichtig?
  - Gelingen: Welche Faktoren haben diese Qualitätsverbesserung unterstützt?
  - Barrieren: Was sind Barrieren für diese?
- Inwiefern hat PART-CHILD dazu geführt, dass in Ihrem SPZ neue Standards in der Versorgung der Patienten eingeführt wurden?
  - Vertiefen: Warum ist dieser Aspekt der Standardisierung wichtig?
  - Gelingen: Was waren die wichtigen Förderfaktoren?
  - Barrieren: Welche Barrieren gab es/gibt es?
- Welche Rolle spielten die Inhalte der Mitarbeiter-Schulungen bei den *[beschriebenen Veränderungen]* hin zu einer höheren Versorgungsqualität bzw. Standardisierung?
- Inwiefern nützt hier die Verwendung der ICF-CY [→ Codieren]?
  - Gelingen: Was machte die Anwendung der ICF-CY einfach?
  - Barrieren: Welche Barrieren gab es bei der Anwendung der ICF-CY?

#### 4. Bilanzierungsfragen (Wrapping up)

- Aus Ihrer bisherigen Erfahrung im PART-CHILD-Projekt: Haben Sie für uns Anregungen, wie wir die PART-CHILD-Intervention in anderen SPZ bestmöglich einführen können?
  - Barrieren: Welche Barrieren könnte es bei der Einführung geben?

#### 5. Nachgespräch (Feedback)

- Möchten Sie noch etwas zum Thema hinzufügen, über das wir nicht gesprochen haben?

- Wie ist es Ihnen während des Interviews ergangen?

---

Zum Schluss habe ich noch ein paar Fragen für unsere Statistik

**Geschlecht Interviewpartner:** ☐ m ☐ w

**Fachkraftgruppe:**

- ☐ Ärzte  
☐ Psychologen  
☐ Therapeuten  
☐ Andere

**Wie lange üben Sie diese Tätigkeit bereits aus?** \_\_\_\_\_

**Wie lange arbeiten Sie bereits in diesem SPZ?** \_\_\_\_\_

---

**Besonderheiten während des Gesprächs/ Anmerkungen/ Beobachtungen**

## Leitfaden für die telefonischen Interviews mit den SPZ-Leitungen

Interviewer: \_\_\_\_\_  
 ID: \_\_\_\_\_  
 SPZ\_ID: \_\_\_\_\_  
 Datum: \_\_\_\_\_  
 Start: \_\_\_\_\_ Ende: \_\_\_\_\_

### 1. Einleitung

- Vorstellung der Interviewerin
- Erklärung zum Ablauf des Interviews, Erklärung zu spontanen Äußerungen und freier Assoziation.
- Hinweis auf Aufzeichnung

Im Folgenden geht es um Ihre Erfahrungen im Rahmen der PART-CHILD-Intervention. Mit Intervention meinen wir sowohl die Mitarbeiterschulung (Haben Sie an dieser teilgenommen?) das ICF-Add-In/die Web-App und die Begleitung im SPZ-Alltag (Modul IMPLEMENT). Mit der Intervention meinen wir aber nicht die Datenerhebung, also nicht die Fragebögen, die Sie austeilten und auch selbst ausfüllen mussten.

### 2. Eingangsfragen (Warm up)

- Wie kommt die Teilnahme am PART-CHILD-Projekt Ihrer Einschätzung nach in Ihrem Team an?
- Was war denn ausschlaggebend für Ihre Bewerbung um die Teilnahme am Projekt?

### 3. Hauptfragen

- Wenn Sie die vergangenen Monate Revue passieren lassen: Inwiefern hat sich die Teilnahme an dem Projekt für Ihr SPZ gelohnt?
- Was schätzen Sie: Wie profitieren die Patienten und Eltern an Ihrem SPZ davon, dass Ihr SPZ am Projekt teilgenommen hat?

### Haltung der Leitung

- Welche Elemente aus der PART-CHILD-Intervention setzen Sie in Ihrem Arbeitsalltag ein?
  - ICF-CY (z.B. Erfassung teilhaberelevanter Domänen nach Lakmoshibek, Codieren)?
    - *Teilhabeorientierung & Patientenzentrierung: Therapieziele (Teilhabestatus/Teilhabepreferenz / Aktionsplan/Handlungsplan) werden zusammen mit Patienten nach bestimmten Kriterien festgelegt, Gespräche nach bestimmten Schemata geführt)*
  - MI-Werkzeugkoffer?
- Wie nutzen Sie derzeit ICF-CY?
  - Warum ist es für Sie persönlich wichtig, ICF-CY anzuwenden?
  - Gelingen: Welche Faktoren sind bei der Einführung der ICF-CY förderlich?
  - Barrieren: Welche Barrieren gibt es bei der Nutzung der ICF-CY?
  - Wie wenden Ihre KollegInnen die ICF-CY an? Unterschiede zwischen Disziplinen?
- Welche Veränderungen beobachten Sie bei Ihrer eigenen Einstellung zu Ihrer Tätigkeit?

## Organisationale Veränderungen

- Was hat sich durch die Teilnahme am Projekt im Arbeitsalltag Ihres SPZ insgesamt verändert?
  - Allgemein: Z.B. Abläufe, Arbeitsweise, mehr Zeit für den Patienten, Dokumentationsaufwand
  - Vertiefung: Wenn mehreres: Was war für Sie als Leitung die wichtigste Veränderung?
  - Warum hat sich das verändert?
  - Gelingen: Was war wichtig, damit diese Veränderung gelingen konnte?
  - Barrieren: Was waren Barrieren für diese Veränderung?
- Was hat sich durch die PART-CHILD-Intervention im Team Ihres SPZ verändert?
  - Welche Fachgruppen tun sich mit dieser Veränderung besonders leicht?
    - Warum denken Sie ist das so?
  - Welche Berufsgruppen tun sich besonders schwer mit der Veränderung?
    - Warum, denken Sie ist das so?
    - Wie könnte man diese Berufsgruppen in diesem Veränderungsprozess unterstützen?
  - Zusammenarbeit zwischen verschiedenen Disziplinen? Interdisziplinäre Verständigung?
  - Kommunikation mit anderen Abteilungen in der Klinik?
- Wenn Sie an die Kommunikation in Ihrem SPZ denken: Welche Rolle spielt ICF dabei?
  - (z.B. Teilhabeorientierung & Patientenzentrierung: Therapieziele (Teilhabestatus/Teilhabepräferenz / Aktionsplan/Handlungsplan) werden zusammen mit Patienten nach bestimmten Kriterien festgelegt, Gespräche nach bestimmten Schemata geführt)
  - Z.B. sind ICF-Themen Gegenstand von Routinebesprechungen?
  - Wird das Arbeiten nach ICF als ein Qualitätskriterium nach Außen kommuniziert?

## Fragen für Standorte, in welchen auch Teams der Frühförderung geschult werden

- Was hat sich durch die PART-CHILD-Intervention in der Zusammenarbeit zwischen dem SPZ und der Frühförderstelle verändert?
- Gab es generelle Unterschiede, wie diese beiden Einrichtungen/ Abteilungen die Inhalte der Teamschulungen in ihre Praxis umgesetzt haben?
- Welche strukturellen Veränderungen haben sich nach der Mitarbeiterschulung an Ihrem SPZ ergeben? / Was konkret tun Sie bereits, damit es weitergeht?
  - Neue Arbeitsgruppe gebildet; MI-Multiplikatoren; Werden neue Mitarbeiter strukturiert in die Schulungsinhalte eingeführt?
  - Warum war es wichtig, diese Struktur einzuführen?
  - Wer war der Initiator der Veränderung (Team/ Leitung)?

## Nutzung von Add-In/Web-App

- In Ihrem SPZ wurde Ihnen die Web-App zum praktischen Arbeiten nach ICF-CY zur Verfügung gestellt. War die App eine sinnvolle Unterstützung bei der praktischen Umsetzung der Schulungsinhalte?
  - Wie sollte sie in weiteren SPZ verwendet werden?
    - Flächendeckend einführen oder eher optionale Nutzung anbieten?

## Standardisierung der Versorgung

- Eines der Projektziele war es, die Versorgungsqualität an SPZ zu verbessern. Inwiefern wurde dies an Ihrem SPZ erreicht?
  - Vertiefen: Woran machen Sie das fest?
  - Warum ist dies für die Versorgungsqualität wichtig?
  - Gelingen: Welche Faktoren haben diese Qualitätsverbesserung unterstützt?
  - Barrieren: Was sind Barrieren für diese?
- Inwiefern hat PART-CHILD dazu geführt, dass in Ihrem SPZ neue Standards in der Versorgung der Patienten eingeführt wurden?
  - Warum ist dieser Aspekt der Standardisierung wichtig?
  - Halten sich alle Fachkräfte an die neuen Standards?
  - Gelingen: Was waren die wichtigen Förderfaktoren?
  - Barrieren: Welche Barrieren gab es/gibt es?
- Welche Rolle spielten die Inhalte der Mitarbeiter-Schulungen bei den [beschriebenen Veränderungen] hin zu einer höheren Versorgungsqualität bzw. Standardisierung der Versorgung?
- Inwiefern nützt hier die Verwendung der ICF-CY [→ Codieren]?
  - Gelingen: Was machte die Anwendung der ICF-CY einfach?
  - Barrieren: Welche Barrieren gab es bei der Anwendung der ICF-CY?

## Kontextfaktoren

In der Evaluation versuchen wir Kontextfaktoren zu ermitteln, die für die Umsetzung der Inhalte der PART-CHILD-Intervention eine Rolle spielen.

- Gelingen: Welche Ressourcen bräuchte es, damit Sie in Ihrem SPZ möglichst viele Elemente der PART-CHILD-Intervention umsetzen können?
  - Strukturell?
  - Personell?
  - Qualifizierungsmaßnahmen (Personal-/Organisationsentwicklung)
- Barrieren: Welche [weiteren, eher SPZ-bezogenen] Barrieren gibt es Ihrer Einschätzung nach, die die Arbeit nach ICF-CY in Ihrem SPZ beeinflussen? Warum sind diese wichtig?

## 4. Bilanzierungsfragen (Wrapping up)

- Und wenn Sie die Datenerhebung kurz außer Acht lassen: Was sollte an der Intervention selbst verändert werden, damit sie in anderen SPZ ankommt?
- Aus Ihrer bisherigen Erfahrung im PART-CHILD-Projekt: Haben Sie für uns Anregungen, wie wir die PART-CHILD-Intervention in anderen SPZ bestmöglich einführen können?
  - Barrieren: Welche Barrieren könnte es bei der Einführung geben?
- Sie haben uns berichtet, dass die PART-CHILD-Intervention Veränderungen in Ihrer Arbeits- und Denkweise mit sich brachte. Wenn Teilhabeorientierung und patientenzentrierte Arbeit mit ICF-CY zur gemeinsamen Perspektive für alle Einrichtungen werden soll, die mit Kindern mit chronischen Erkrankungen arbeiten:
  - Gelingen: Was bräuchte es dafür?
  - Barrieren: Mit welchen Barrieren sollte man rechnen?

## 5. Nachgespräch (Feedback)

- Möchten Sie noch etwas zum Thema hinzufügen, über das wir nicht gesprochen haben?
- Wie ist es Ihnen während des Interviews ergangen?

---

**Geschlecht Interviewpartner:** ☐ m ☐ w

---

**Besonderheiten während des Gesprächs/ Anmerkungen/ Beobachtungen**

**Online Supplementary File S4: Completed SPIRIT Checklist**



| Section/item                      | Item No | Description                                                                                                                                                                                                                                                                                         |
|-----------------------------------|---------|-----------------------------------------------------------------------------------------------------------------------------------------------------------------------------------------------------------------------------------------------------------------------------------------------------|
| <b>Administrative information</b> |         |                                                                                                                                                                                                                                                                                                     |
| Title                             | 1       | Descriptive title identifying the study design, population, interventions, and, if applicable, trial acronym (page 1)                                                                                                                                                                               |
| Trial registration                | 2a      | Trial identifier and registry name. If not yet registered, name of intended registry (page 4)                                                                                                                                                                                                       |
|                                   | 2b      | All items from the World Health Organization Trial Registration Data Set (not applicable)                                                                                                                                                                                                           |
| Protocol version                  | 3       | Date and version identifier (not applicable)                                                                                                                                                                                                                                                        |
| Funding                           | 4       | Sources and types of financial, material, and other support (page 29)                                                                                                                                                                                                                               |
| Roles and responsibilities        | 5a      | Names, affiliations, and roles of protocol contributors (pages 1 and 28)                                                                                                                                                                                                                            |
|                                   | 5b      | Name and contact information for the trial sponsor (page 2)                                                                                                                                                                                                                                         |
|                                   | 5c      | Role of study sponsor and funders, if any, in study design; collection, management, analysis, and interpretation of data; writing of the report; and the decision to submit the report for publication, including whether they will have ultimate authority over any of these activities (page 29). |
|                                   | 5d      | Composition, roles, and responsibilities of the coordinating centre, steering committee, endpoint adjudication committee, data management team, and other individuals or groups overseeing the trial, if applicable (see Item 21a for data monitoring committee) (not applicable)                   |
| <b>Introduction</b>               |         |                                                                                                                                                                                                                                                                                                     |
| Background and rationale          | 6a      | Description of research question and justification for undertaking the trial, including summary of relevant studies (published and unpublished) examining benefits and harms for each intervention (pages 6 – 8)                                                                                    |
|                                   | 6b      | Explanation for choice of comparators (not applicable)                                                                                                                                                                                                                                              |
| Objectives                        | 7       | Specific objectives or hypotheses (page 9)                                                                                                                                                                                                                                                          |
| Trial design                      | 8       | Description of trial design including type of trial (eg, parallel group, crossover, factorial, single group), allocation ratio, and framework (eg, superiority, equivalence, noninferiority, exploratory) (page 9)                                                                                  |

## **Methods: Participants, interventions, and outcomes**

|                      |     |                                                                                                                                                                                                                                                                                                                                                                                          |
|----------------------|-----|------------------------------------------------------------------------------------------------------------------------------------------------------------------------------------------------------------------------------------------------------------------------------------------------------------------------------------------------------------------------------------------|
| Study setting        | 9   | Description of study settings (eg, community clinic, academic hospital) and list of countries where data will be collected. Reference to where list of study sites can be obtained (page 10)                                                                                                                                                                                             |
| Eligibility criteria | 10  | Inclusion and exclusion criteria for participants. If applicable, eligibility criteria for study centres and individuals who will perform the interventions (eg, surgeons, psychotherapists) (page 12 and 18)                                                                                                                                                                            |
| Interventions        | 11a | Interventions for each group with sufficient detail to allow replication, including how and when they will be administered (pages 12 – 15)                                                                                                                                                                                                                                               |
|                      | 11b | Criteria for discontinuing or modifying allocated interventions for a given trial participant (eg, drug dose change in response to harms, participant request, or improving/worsening disease) (not applicable)                                                                                                                                                                          |
|                      | 11c | Strategies to improve adherence to intervention protocols, and any procedures for monitoring adherence (eg, drug tablet return, laboratory tests) (page 23)                                                                                                                                                                                                                              |
|                      | 11d | Relevant concomitant care and interventions that are permitted or prohibited during the trial (not applicable)                                                                                                                                                                                                                                                                           |
| Outcomes             | 12  | Primary, secondary, and other outcomes, including the specific measurement variable (eg, systolic blood pressure), analysis metric (eg, change from baseline, final value, time to event), method of aggregation (eg, median, proportion), and time point for each outcome. Explanation of the clinical relevance of chosen efficacy and harm outcomes is strongly recommended (page 20) |
| Participant timeline | 13  | Time schedule of enrolment, interventions (including any run-ins and washouts), assessments, and visits for participants. A schematic diagram is highly recommended (see Figure) (pages 19 – 20)                                                                                                                                                                                         |
| Sample size          | 14  | Estimated number of participants needed to achieve study objectives and how it was determined, including clinical and statistical assumptions supporting any sample size calculations (pages 17 – 18)                                                                                                                                                                                    |
| Recruitment          | 15  | Strategies for achieving adequate participant enrolment to reach target sample size (pages 19 – 20)                                                                                                                                                                                                                                                                                      |

## **Methods: Assignment of interventions (for controlled trials)**

### **Allocation:**

|                     |     |                                                                                                                                                                                                                                                                                                                                                                    |
|---------------------|-----|--------------------------------------------------------------------------------------------------------------------------------------------------------------------------------------------------------------------------------------------------------------------------------------------------------------------------------------------------------------------|
| Sequence generation | 16a | Method of generating the allocation sequence (eg, computer-generated random numbers), and list of any factors for stratification. To reduce predictability of a random sequence, details of any planned restriction (eg, blocking) should be provided in a separate document that is unavailable to those who enrol participants or assign interventions (page 17) |
|---------------------|-----|--------------------------------------------------------------------------------------------------------------------------------------------------------------------------------------------------------------------------------------------------------------------------------------------------------------------------------------------------------------------|

|                                  |     |                                                                                                                                                                                                                     |
|----------------------------------|-----|---------------------------------------------------------------------------------------------------------------------------------------------------------------------------------------------------------------------|
| Allocation concealment mechanism | 16b | Mechanism of implementing the allocation sequence (eg, central telephone; sequentially numbered, opaque, sealed envelopes), describing any steps to conceal the sequence until interventions are assigned (page 17) |
| Implementation                   | 16c | Who will generate the allocation sequence, who will enrol participants, and who will assign participants to interventions (page 17)                                                                                 |
| Blinding (masking)               | 17a | Who will be blinded after assignment to interventions (eg, trial participants, care providers, outcome assessors, data analysts), and how (page 17)                                                                 |
|                                  | 17b | If blinded, circumstances under which unblinding is permissible, and procedure for revealing a participant's allocated intervention during the trial (not applicable)                                               |

### **Methods: Data collection, management, and analysis**

|                         |     |                                                                                                                                                                                                                                                                                                                                                                                                                              |
|-------------------------|-----|------------------------------------------------------------------------------------------------------------------------------------------------------------------------------------------------------------------------------------------------------------------------------------------------------------------------------------------------------------------------------------------------------------------------------|
| Data collection methods | 18a | Plans for assessment and collection of outcome, baseline, and other trial data, including any related processes to promote data quality (eg, duplicate measurements, training of assessors) and a description of study instruments (eg, questionnaires, laboratory tests) along with their reliability and validity, if known. Reference to where data collection forms can be found, if not in the protocol (pages 19 – 20) |
|                         | 18b | Plans to promote participant retention and complete follow-up, including list of any outcome data to be collected for participants who discontinue or deviate from intervention protocols (not applicable)                                                                                                                                                                                                                   |
| Data management         | 19  | Plans for data entry, coding, security, and storage, including any related processes to promote data quality (eg, double data entry; range checks for data values). Reference to where details of data management procedures can be found, if not in the protocol (page 20)                                                                                                                                                  |
| Statistical methods     | 20a | Statistical methods for analysing primary and secondary outcomes. Reference to where other details of the statistical analysis plan can be found, if not in the protocol (pages 20 – 21)                                                                                                                                                                                                                                     |
|                         | 20b | Methods for any additional analyses (eg, subgroup and adjusted analyses) (not applicable)                                                                                                                                                                                                                                                                                                                                    |
|                         | 20c | Definition of analysis population relating to protocol non-adherence (eg, as randomised analysis), and any statistical methods to handle missing data (eg, multiple imputation) (page 20)                                                                                                                                                                                                                                    |

## **Methods: Monitoring**

|                 |     |                                                                                                                                                                                                                                                                                                                                                        |
|-----------------|-----|--------------------------------------------------------------------------------------------------------------------------------------------------------------------------------------------------------------------------------------------------------------------------------------------------------------------------------------------------------|
| Data monitoring | 21a | Composition of data monitoring committee (DMC); summary of its role and reporting structure; statement of whether it is independent from the sponsor and competing interests; and reference to where further details about its charter can be found, if not in the protocol. Alternatively, an explanation of why a DMC is not needed (not applicable) |
|                 | 21b | Description of any interim analyses and stopping guidelines, including who will have access to these interim results and make the final decision to terminate the trial (not applicable)                                                                                                                                                               |
| Harms           | 22  | Plans for collecting, assessing, reporting, and managing solicited and spontaneously reported adverse events and other unintended effects of trial interventions or trial conduct (not applicable)                                                                                                                                                     |
| Auditing        | 23  | Frequency and procedures for auditing trial conduct, if any, and whether the process will be independent from investigators and the sponsor (not applicable)                                                                                                                                                                                           |

## **Ethics and dissemination**

|                          |     |                                                                                                                                                                                                                                                   |
|--------------------------|-----|---------------------------------------------------------------------------------------------------------------------------------------------------------------------------------------------------------------------------------------------------|
| Research ethics approval | 24  | Plans for seeking research ethics committee/institutional review board (REC/IRB) approval (page 26)                                                                                                                                               |
| Protocol amendments      | 25  | Plans for communicating important protocol modifications (eg, changes to eligibility criteria, outcomes, analyses) to relevant parties (eg, investigators, REC/IRBs, trial participants, trial registries, journals, regulators) (not applicable) |
| Consent or assent        | 26a | Who will obtain informed consent or assent from potential trial participants or authorised surrogates, and how (see Item 32) (page 26)                                                                                                            |
|                          | 26b | Additional consent provisions for collection and use of participant data and biological specimens in ancillary studies, if applicable (not applicable)                                                                                            |
| Confidentiality          | 27  | How personal information about potential and enrolled participants will be collected, shared, and maintained in order to protect confidentiality before, during, and after the trial (page 26)                                                    |
| Declaration of interests | 28  | Financial and other competing interests for principal investigators for the overall trial and each study site (page 29)                                                                                                                           |
| Access to data           | 29  | Statement of who will have access to the final trial dataset, and disclosure of contractual agreements that limit such access for investigators (not applicable)                                                                                  |

|                               |     |                                                                                                                                                                                                                                                                                               |
|-------------------------------|-----|-----------------------------------------------------------------------------------------------------------------------------------------------------------------------------------------------------------------------------------------------------------------------------------------------|
| Ancillary and post-trial care | 30  | Provisions, if any, for ancillary and post-trial care, and for compensation to those who suffer harm from trial participation (not applicable)                                                                                                                                                |
| Dissemination policy          | 31a | Plans for investigators and sponsor to communicate trial results to participants, healthcare professionals, the public, and other relevant groups (eg, via publication, reporting in results databases, or other data sharing arrangements), including any publication restrictions (page 26) |
|                               | 31b | Authorship eligibility guidelines and any intended use of professional writers (not applicable)                                                                                                                                                                                               |
|                               | 31c | Plans, if any, for granting public access to the full protocol, participant-level dataset, and statistical code (not applicable)                                                                                                                                                              |

## Appendices

|                            |    |                                                                                                                                                                                                                 |
|----------------------------|----|-----------------------------------------------------------------------------------------------------------------------------------------------------------------------------------------------------------------|
| Informed consent materials | 32 | Model consent form and other related documentation given to participants and authorised surrogates (Online Supplementary File 5)                                                                                |
| Biological specimens       | 33 | Plans for collection, laboratory evaluation, and storage of biological specimens for genetic or molecular analysis in the current trial and for future use in ancillary studies, if applicable (not applicable) |

---

## **Online Supplementary File S5: Consent forms**

**Mannheimer Institut für Public Health**

Direktor: Prof. Dr. med. Joachim Fischer

Projektleitung: Prof. Dr. med. Freia De Bock

Vertretung: Dr. Tatiana Görig, Dr. med. univ. Michael Eichinger

Ludolf-Krehl-Str. 7-11, 68167 Mannheim

Telefon: +49 621 383-71834, Telefax: +49 621 383-71801

E-Mail: [partchild@medma.uni-heidelberg.de](mailto:partchild@medma.uni-heidelberg.de)**PART-CHILD****Verbesserung der Versorgungsqualität für Kinder mit chronischen Erkrankungen und Behinderungen durch die  
Stärkung von Partizipation und Teilhabe in Sozialpädiatrischen Zentren****Einwilligungserklärung der Eltern**

zur Teilnahme an der Befragung

im Rahmen des wissenschaftlichen Projekts PART-CHILD

Liebe Eltern,

im Rahmen des Projekts PART-CHILD werden Daten über Sie und Ihr Kind erhoben. Die Weitergabe, Speicherung und Auswertung dieser projektbezogenen Daten erfolgt nach gesetzlichen Bestimmungen und setzt vor Teilnahme an dem Projekt folgende freiwillige Erklärung voraus:

Hiermit bestätige ich, dass ich über die Teilnahme an der wissenschaftlichen Befragung von meiner Fachkraft im SPZ umfassend und ausreichend informiert wurde. Ich und mein Kind hatten ausreichend Bedenkzeit, und alle unsere Fragen wurden im Vorhinein vollumfänglich beantwortet. Ich stimme auch im Sinne meines Kindes der Teilnahme an dieser Befragung freiwillig zu.

Ich erkläre mich einverstanden, dass im Rahmen der Studie erhobene Daten auf Fragebögen und/oder elektronischen Datenträgern aufgezeichnet und unter Nennung meines persönlichen Codes (pseudonymisiert) ausgewertet werden. Außerdem bin ich damit einverstanden, dass die Studiendaten in anonymisierter Form (d.h. ohne Namensnennung) für wissenschaftliche Darstellungen und Veröffentlichungen verwendet werden.

Mir ist bekannt,

- (1) dass ich diese Einwilligung jederzeit ohne Angabe von Gründen und ohne Nachteile widerrufen kann (telefonisch unter: 0621-383-71834 oder per Email an: [partchild@medma.uni-heidelberg.de](mailto:partchild@medma.uni-heidelberg.de)),
- (2) dass die Rechtmäßigkeit der bis zum Widerruf erfolgten Datenverarbeitung davon nicht berührt wird. In diesem Fall kann ich entscheiden, ob die von mir erhobenen Daten gelöscht werden sollen oder weiterhin für die Zwecke des wissenschaftlichen Projekts verwendet werden dürfen.

Ich möchte meine Daten ab Ende 2020 für weitere 10 Jahre für wissenschaftliche Auswertungen zur Verbesserung der Versorgungsqualität an SPZ zur Verfügung stellen.

Das Projektteam darf mir den Online-Fragebogen an folgende E-Mail-Adresse zuschicken:

---

Wenn ich unter der oben genannten E-Mail-Adresse nicht erreichbar bin, darf mir das Projektteam den Papierfragebogen an folgende Adresse senden:

---

- ☐ Ich stimme zu, dass mein Kind teilnehmen kann (wenn das Kind  $\geq 7$  Jahre alt ist).
- ☐ Ich stimme zu, dass ich nach Projektende gegebenenfalls ein weiteres Mal zum Ausfüllen eines kurzen Online-Fragebogens eingeladen werde. In diesem Fragebogen geht es ebenfalls um die Versorgungsqualität an Ihrem SPZ.

**Die Originale der Elterninformation und der Einwilligungserklärung verbleiben bei mir. Den Erhalt der beiden Dokumente bestätige ich hiermit. Auf dem Forschungsdatenserver der Medizinischen Fakultät Mannheim der Universität Heidelberg wird lediglich eine elektronische Kopie der Einwilligungserklärung gespeichert. Den Inhalt der vorliegenden Einwilligungserklärung und der zugehörigen Informationsschrift habe ich verstanden.**

**Unterschreibt nur ein Erziehungsberechtigter, bestätigt dieser, dass er entweder das alleinige Sorgerecht innehat oder in Übereinstimmung mit dem anderen ebenfalls sorgeberechtigten Erziehungsberechtigten handelt.**

Name des Erziehungsberechtigten in DRUCKBUCHSTABEN: \_\_\_\_\_

Name des Erziehungsberechtigten in DRUCKBUCHSTABEN: \_\_\_\_\_

Name des Kindes in DRUCKBUCHSTABEN: \_\_\_\_\_

Ort, Datum: \_\_\_\_\_

Unterschrift des Erziehungsberechtigten: \_\_\_\_\_

Unterschrift des Erziehungsberechtigten: \_\_\_\_\_

### **Aufklärende Person**

Der Patient und seine Eltern wurden von mir im Rahmen eines Vorabgesprächs über das Ziel und den Ablauf des wissenschaftlichen Projekts aufgeklärt. Ein Exemplar der Informationsschrift und der Einwilligungserklärung habe ich dem Elternteil und dem Patienten ausgehändigt.

Name der aufklärenden Person in DRUCKBUCHSTABEN: \_\_\_\_\_

Ort, Datum: \_\_\_\_\_

Unterschrift der aufklärenden Person: \_\_\_\_\_



**Vergabe eines eigenen Codes für Ihre Angaben**

Damit keine Rückschlüsse auf Ihre Person möglich sind, ist es notwendig, dass in den von Ihnen ausgefüllten Fragebögen statt Ihres Namens ein Code eingetragen wird. Dazu notieren Sie in den untenstehenden Kästchen wie folgt:

In die ersten zwei Kästchen notieren Sie die **zwei letzten** Buchstaben des **ersten Vornamens Ihres Kindes**.

In die nächsten zwei Kästchen notieren Sie die **zwei letzten** Buchstaben des **Nachnamens Ihres Kindes**.

In die folgenden zwei Kästchen notieren Sie den **Geburtsstag der leiblichen Mutter** des Kindes.

In die letzten zwei Kästchen notieren Sie den **Geburtsmonat der leiblichen Mutter** des Kindes.

**Beispiel:** Das Kind heißt Peter Michael Musterkind. Seine leibliche Mutter hat am **09.04.** Geburtstag.

Der Code lautet daher:

|   |   |   |   |   |   |   |   |
|---|---|---|---|---|---|---|---|
| E | R | N | D | 0 | 9 | 0 | 4 |
|---|---|---|---|---|---|---|---|

 **Bitte tragen Sie hier Ihren Code ein:**

|  |  |  |  |  |  |  |  |
|--|--|--|--|--|--|--|--|
|  |  |  |  |  |  |  |  |
|--|--|--|--|--|--|--|--|

---

Liebe Eltern,

wir senden Ihnen eine E-Mail mit einem Link zu unserem Online-Fragebogen von unserer E-Mail-Adresse  
[partchild@medma.uni-heidelberg.de](mailto:partchild@medma.uni-heidelberg.de).

---

 **Bitte lassen Sie das SPZ-Team diese Einwilligungserklärung (alle 3 Seiten!) kopieren.**

**Mannheimer Institut für Public Health**

Direktor: Prof. Dr. med. Joachim Fischer

Projektleitung: Prof. Dr. med. Freia De Bock

Vertretung: Dr. Tatiana Görig, Dr. med. univ. Michael Eichinger

Ludolf-Krehl-Str. 7-11, 68167 Mannheim

Telefon: +49 621 383-71834, Telefax: +49 621 383-71801

E-Mail: [partchild@medma.uni-heidelberg.de](mailto:partchild@medma.uni-heidelberg.de)

**PART-CHILD**

**Verbesserung der Versorgungsqualität für Kinder mit chronischen Erkrankungen und Behinderungen  
durch die Stärkung von Partizipation und Teilhabe in Sozialpädiatrischen Zentren**

**Einwilligungserklärung der Kinder über 10 Jahre und Jugendlichen**

zur Teilnahme im Rahmen des wissenschaftlichen Projekts PART-CHILD

Liebes Kind,  
liebe Jugendliche, lieber Jugendlicher,

im Rahmen des Projekts PART-CHILD werden Daten über Dich erhoben. Die Weitergabe, Speicherung und Auswertung dieser projektbezogenen Daten erfolgt nach gesetzlichen Bestimmungen. Um teilzunehmen, musst du Folgendes freiwillig erklären:

Hiermit bestätige ich, dass ich über die Teilnahme an der Befragung von meiner Fachkraft im SPZ voll und ganz informiert wurde. Ich hatte ausreichend Bedenkzeit, und alle meine Fragen wurden im Vorhinein voll und ganz beantwortet. Ich stimme dieser Befragung freiwillig zu.

Außerdem bin ich damit einverstanden, dass meine Antworten von den Projektmitarbeitern gespeichert und ohne Namensnennung ausgewertet werden. Ich stimme auch zu, dass meine Antworten ohne Namensnennung in wissenschaftlichen Veröffentlichungen verwendet werden.

Ich weiß,

- (1) dass meine Teilnahme vollkommen freiwillig ist. Ich weiß, dass ich meine Einwilligung jederzeit ohne Angabe von Gründen und ohne Nachteile zurückziehen kann. Meine Einwilligung kann ich zurückziehen telefonisch unter: 0621-383-71834 oder per E-Mail an: [partchild@medma.uni-heidelberg.de](mailto:partchild@medma.uni-heidelberg.de).
- (2) dass ich, wenn ich nicht mehr teilnehmen möchte, entscheiden kann, ob meine Antworten weiter verwendet werden dürfen.

Ich bin einverstanden, dass meine Antworten auch nach Projektabschluss Ende 2020 für weitere 10 Jahre für andere ähnliche wissenschaftliche Auswertungen verwendet werden.

**Die Originale der Kinderinformation und der Einwilligungserklärung bleiben bei mir. Ich bestätige hiermit, dass ich beide Dokument erhalten habe. Auf dem Server der Universität Heidelberg wird lediglich eine elektronische Kopie der Einwilligungserklärung gespeichert.**

**Den Inhalt dieser Einwilligungserklärung und der zugehörigen Informationsschrift habe ich verstanden. Mit der beschriebenen Vorgehensweise bin ich einverstanden.**

Name des Kindes/  
des/der Jugendlichen in **DRUCKBUCHSTABEN**: \_\_\_\_\_

Ort, Datum: \_\_\_\_\_

Unterschrift des Kindes/des/der Jugendlichen: \_\_\_\_\_

#### **Aufklärende Person**

Der Patient wurde von mir im Rahmen eines Vorabgesprächs über das Ziel und den Ablauf des wissenschaftlichen Projekts aufgeklärt. Ein Exemplar der Informationsschrift und der Einwilligungserklärung habe ich dem Patienten ausgehändigt.

Name der aufklärenden Person in **DRUCKBUCHSTABEN**: \_\_\_\_\_

Ort, Datum: \_\_\_\_\_

Unterschrift der aufklärenden Person: \_\_\_\_\_

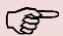

**Bitte die Mitarbeiter des SPZ diese 2 Seiten zu kopieren.**

**Mannheimer Institut für Public Health**

Direktor: Prof. Dr. med. Joachim Fischer

Projektleitung: Prof. Dr. med. Freia De Bock

Vertretung: Dr. Tatiana Görig, Dr. med. univ. Michael Eichinger

Ludolf-Krehl-Str. 7-11, 68167 Mannheim

Telefon: +49 621 383-71834, Telefax: +49 621 383-71801

E-Mail: [partchild@medma.uni-heidelberg.de](mailto:partchild@medma.uni-heidelberg.de)**PART-CHILD****Verbesserung der Versorgungsqualität für Kinder mit chronischen Erkrankungen und Behinderungen durch die Stärkung von Partizipation und Teilhabe in Sozialpädiatrischen Zentren****Einwilligungserklärung für Kinder unter 10 Jahren**

Willst du an der Befragung im Projekt PART-CHILD teilnehmen?

Liebes Kind,

damit wir Dir ein paar Fragen stellen dürfen, musst Du uns für die nächsten Sätze Dein OK geben.

Ich bin einverstanden, dass ich an der Befragung teilnehme.

Ich bin einverstanden, dass meine Antworten ohne meinen Namen von den Forschern angeschaut werden.

Ich bin einverstanden, dass meine Antworten ohne meinen Namen von den Forschern gespeichert werden.

Alle meine Fragen wurden beantwortet.

Ich hatte genug Zeit, zu überlegen, ob ich mitmachen möchte.

Ich nehme ganz freiwillig teil.

Ich weiß, dass ich mich jederzeit anders entscheiden kann und nicht mehr an der Befragung teilnehmen muss.

Ich muss dafür keine Gründe nennen. Ich weiß, dass das nicht schlimm ist.

Wenn ich nicht mehr teilnehmen möchte, kann ich das

- Am Telefon: 0621-383-71834 sagen.
- In einer E-Mail: [partchild@medma.uni-heidelberg.de](mailto:partchild@medma.uni-heidelberg.de) schreiben.

Ich bin einverstanden, dass meine Antworten nach Projektende Ende 2020 weitere 10 Jahre auch für andere, ähnliche wissenschaftliche Auswertungen verwendet werden.

**Ich habe verstanden, was hier und in der Informationsschrift geschrieben steht. Ich möchte mitmachen.***Schreibe hier Deinen Namen in DRUCKBUCHSTABEN auf:*

---

*In welcher Stadt bist Du gerade?*

---

*Welches Datum ist heute?*

---

*Schreibe hier Deine Unterschrift hin:*

---

**Aufklärende Person**

Der Patient wurde von mir im Rahmen eines Vorabgesprächs über das Ziel und den Ablauf der Studie aufgeklärt. Ein Exemplar der Informationsschrift und der Einwilligungserklärung habe ich dem Patienten ausgehändigt.

*Name der aufklärenden Person in Druckbuchstaben:*

---

*Ort, Datum:*

---

*Unterschrift der aufklärenden Person:*

---

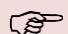**Bitte die Mitarbeiter des SPZ diese Seite zu kopieren.**

# Online Supplementary File S6: Framework for participation-centred care

| Elements                                                                                  | Explanation                                                                                                                                                                                                                                                                                                                                          |
|-------------------------------------------------------------------------------------------|------------------------------------------------------------------------------------------------------------------------------------------------------------------------------------------------------------------------------------------------------------------------------------------------------------------------------------------------------|
| <b>Knowledge and attitudes concerning key concepts</b>                                    |                                                                                                                                                                                                                                                                                                                                                      |
| 1 Appreciation of participation-centredness                                               | Commitment to (1) an extended view of a child's health condition including the family's perspectives and its implications for participation, (2) shared decision-making and (3) a guiding role of healthcare staff                                                                                                                                   |
| 2 Knowledge of participation-centred needs assessment                                     | Basic knowledge about steps to conduct a participation-centred needs assessment under active involvement of children and their parents (e.g., joint clarification of concerns, participation restrictions and resources, formulation of participation goals)                                                                                         |
| 3 Appreciation of interdisciplinarity                                                     | Appreciation of collaboration in interdisciplinary teams at eye level                                                                                                                                                                                                                                                                                |
| 4 Knowledge of the ICF-CY and other concepts related to participation                     | Knowledge about <ul style="list-style-type: none"> <li>the ICF-CY and its components (body structures, body functions, activities, participation, personal factors and environment)</li> <li>the concept of functional health</li> <li>the biopsychosocial model of health</li> <li>Convention on the Rights of Persons with Disabilities</li> </ul> |
| <b>Skills and competencies</b>                                                            |                                                                                                                                                                                                                                                                                                                                                      |
| 5 Clarification of concerns                                                               | Based on the professional experience of staff, identification and prioritisation (if needed) of concerns of children and their parents that made them seek care                                                                                                                                                                                      |
| 6 Characterisation of daily life activities associated with the identified concerns       | Joint description of daily life activities and their contexts associated with the children's and parents' concerns (identified in element 5) and their mapping to the nine ICF life domains (e.g., learning, communication, mobility, self-care)                                                                                                     |
| 7 Joint identification of areas in need of improved participation and available resources | Joint identification and documentation of the life domains in need of improved participation and assessment of abilities in other life domains potentially useful for reaching improvement by patients, their parents and staff                                                                                                                      |
| 8 Formulation of participation goals                                                      | Formulation of participation goals (based on the areas identified in element 7) emphasising the discrepancy between the goal and the status quo; the participation goals may be SMART (i.e., specific, measurable, achievable, relevant, time-bound), are attractive to the child and are under his/her control                                      |
| 9 Compilation of an ICF-CY profile                                                        | Identification of the most important aspects related to the participation goals (identified in element 8), mapping these to the ICF components and relating them to each other in preparation for the development of an action plan (element 11)                                                                                                     |
| 10 Identification of interventions                                                        | Joint identification of the most appropriate procedures, interventions or therapies to achieve the most important aspects of the participation goals (identified in element 8)                                                                                                                                                                       |

---

|    |                               |                                                                                                                                                                       |
|----|-------------------------------|-----------------------------------------------------------------------------------------------------------------------------------------------------------------------|
| 11 | Development of an action plan | Agreement and documentation of specific next steps taken to achieve the child's participation goals by addressing the what, how, until when and by whom for each step |
|----|-------------------------------|-----------------------------------------------------------------------------------------------------------------------------------------------------------------------|

**Cross-cutting skills**

|                                                                    |                                                                                                                                                                                                                                                                                                                           |
|--------------------------------------------------------------------|---------------------------------------------------------------------------------------------------------------------------------------------------------------------------------------------------------------------------------------------------------------------------------------------------------------------------|
| Use of ICF-CY codes in routine documentation                       | Use of ICF-CY codes to support a concise yet comprehensive documentation of information identified in the context of other elements of the framework (e.g., when compiling an ICF-CY profile)                                                                                                                             |
| Application of principles and methods of motivational interviewing | Application of key principles (e.g., develop discrepancy, support self-efficacy) and methods of motivational interviewing (e.g., asking open questions, rolling with resistance) when clarifying concerns, finding consensus among all participants involved, identifying participation goals, or developing action plans |
| Delivery of care in the context of the wider care network          | Consideration of the wider care network comprising professionals from different sectors and professions during the entire care process and involvement of all relevant stakeholders when developing and implementing action plans                                                                                         |

---
